# Supplementary material for: Transcription Analysis of Central Metabolism Genes in Escherichia coli. Possible Roles of σ38 in Their Expression, as a Response to Carbon Limitation
Source: PubMed Central journal article supplement (PMC2759082; doi:10.1371/journal.pone.0007466), 2009-10-19

Figure S2

a. The nucleotide sequence of the *EcoRI-HindIII* segment carrying the promoter region of the *poxB* gene cloned in plasmid pSR, as well as other relevant DNA regions of this plasmid, are presented, as an example for the production of promoter gene specific fragments.

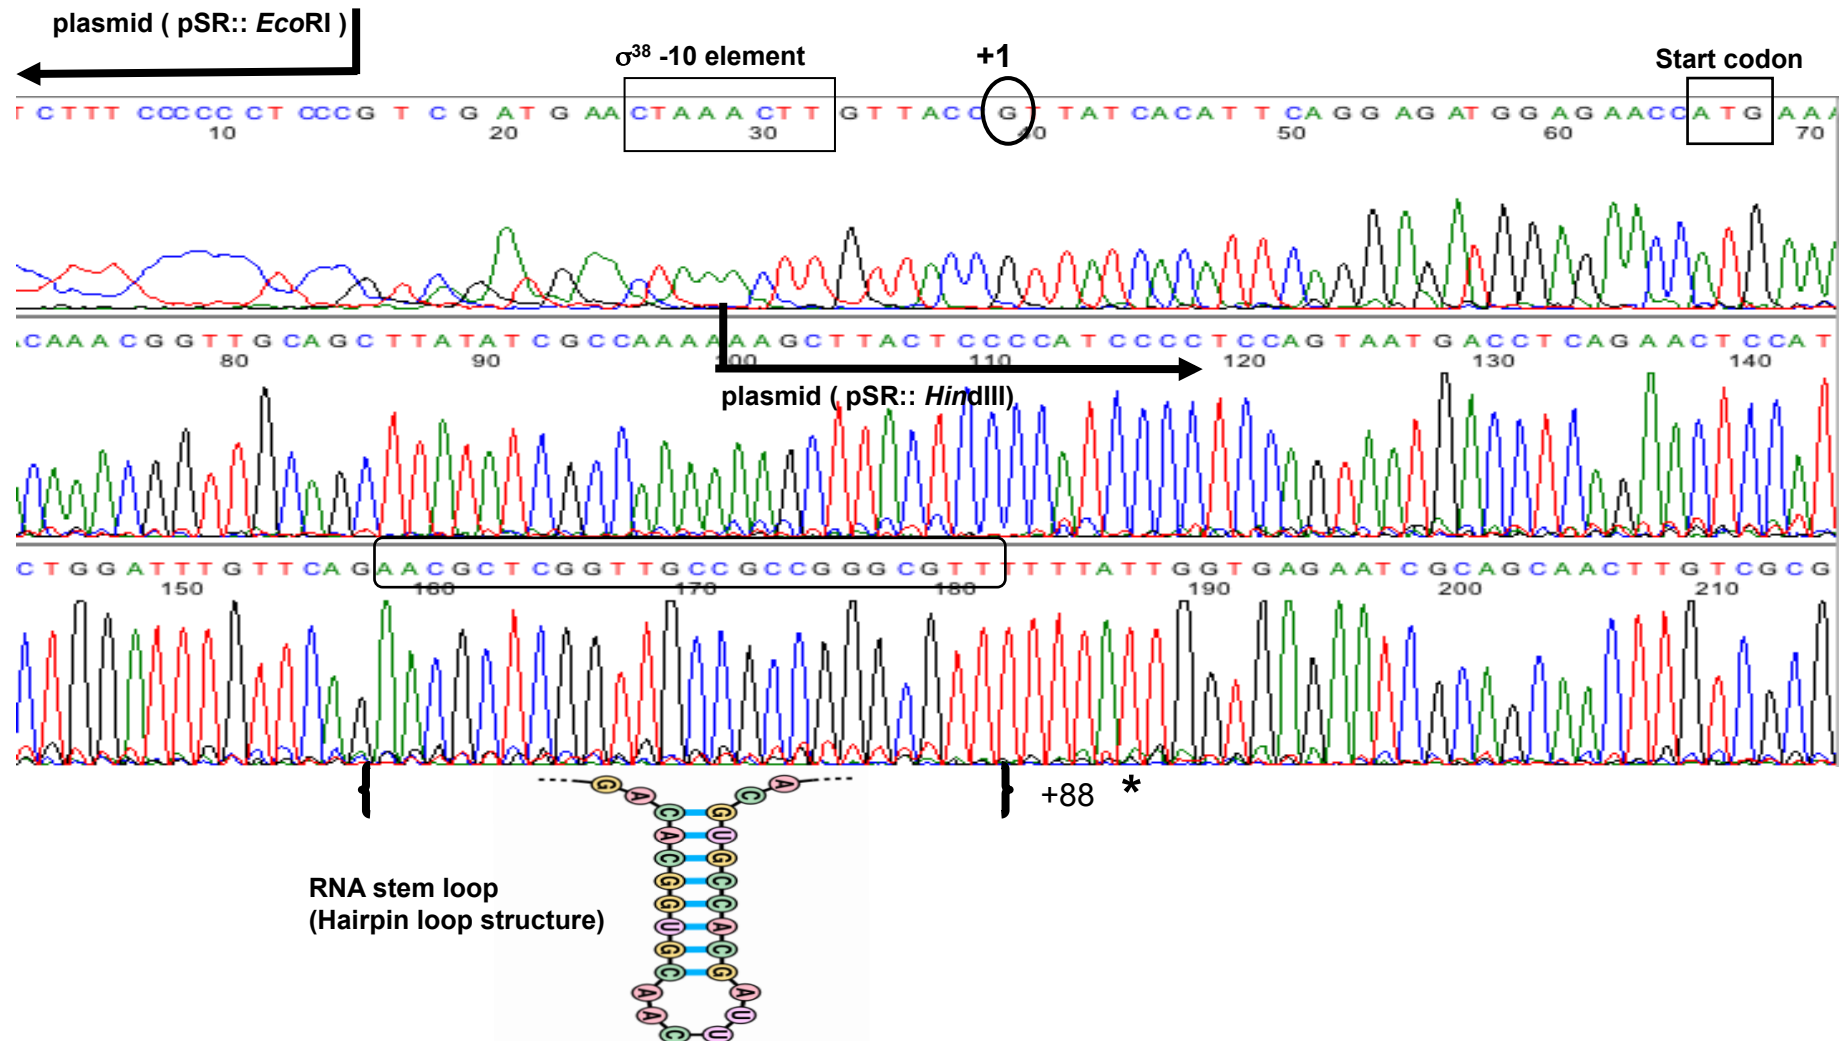

b. *pgi* Glucosephosphate isomerase

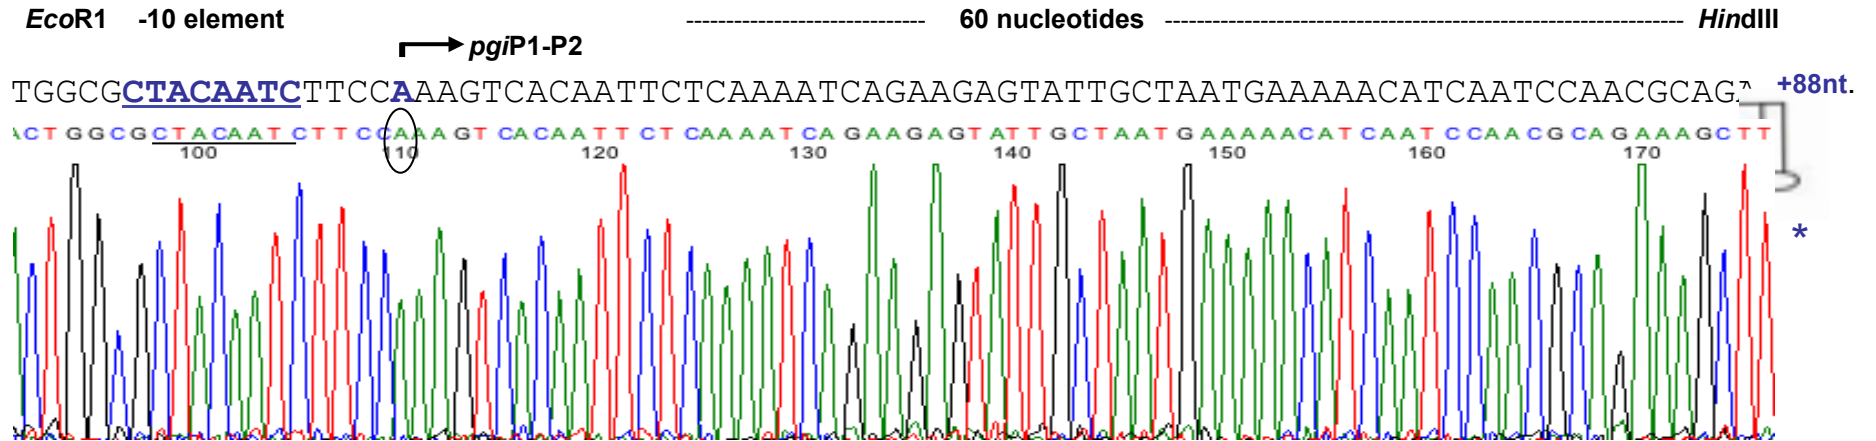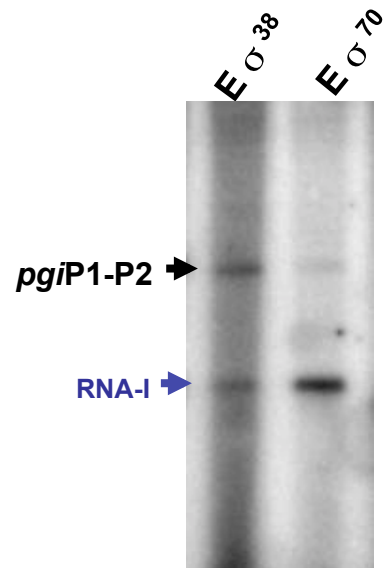

1

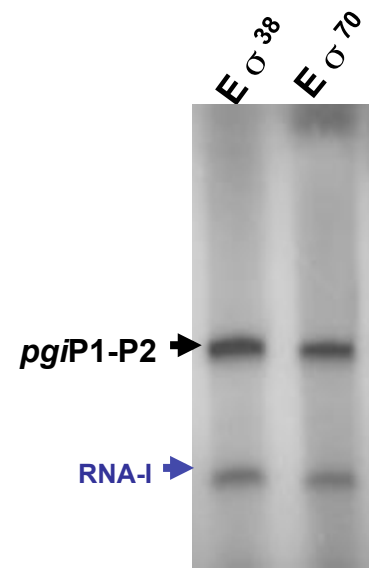

2

c. *pfkA* 6-phosphofructokinase I

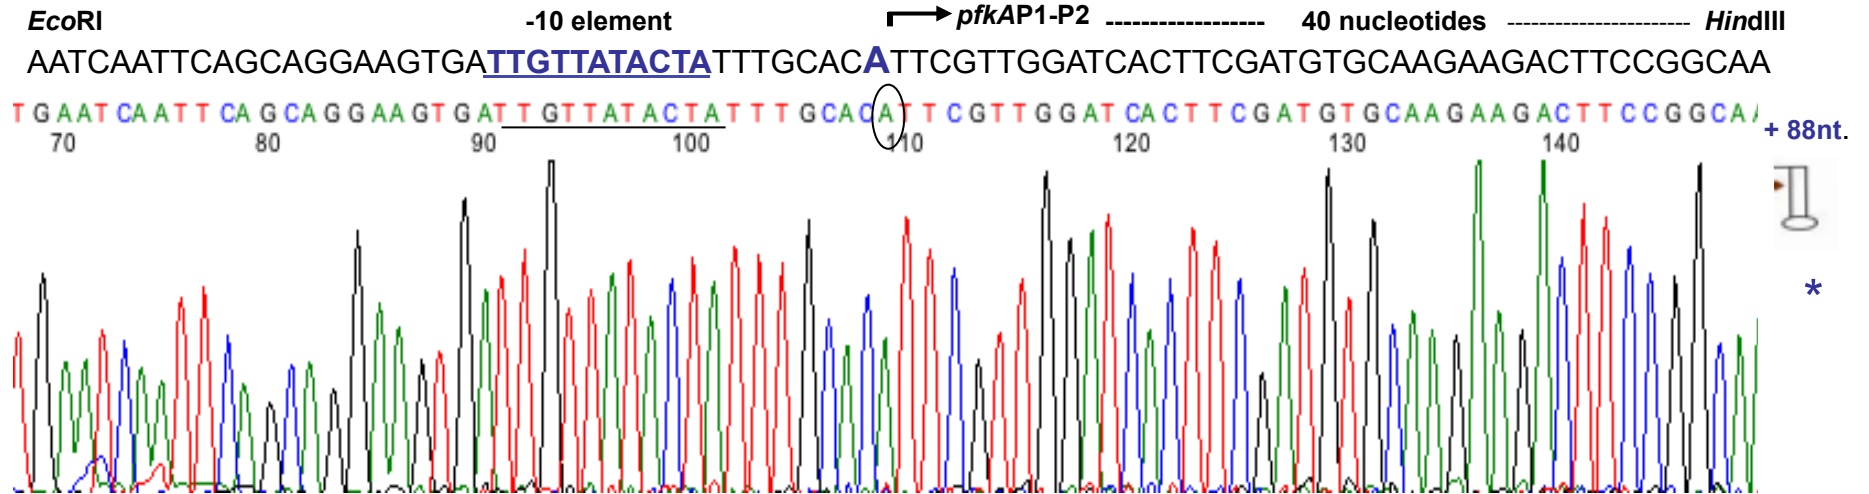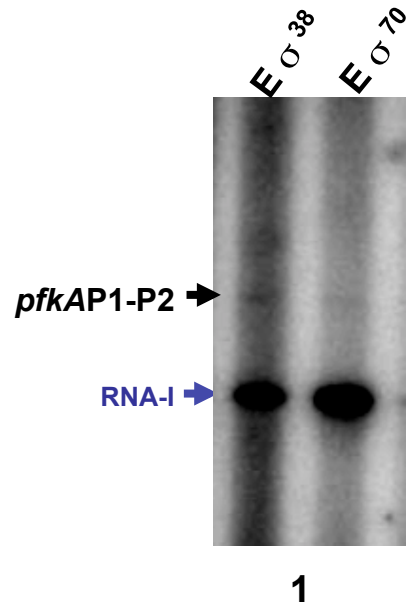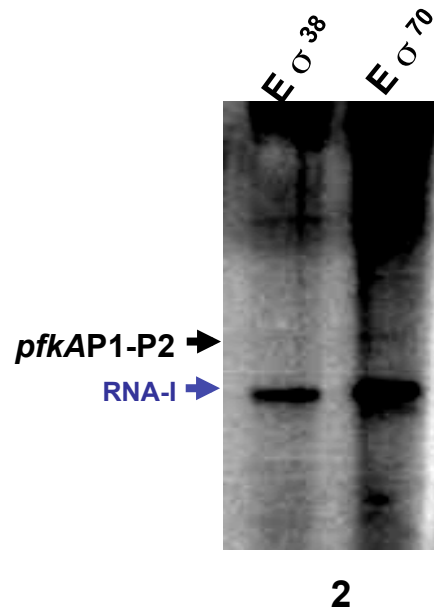

d. *gapA* Glyceraldehyde 3-phosphate dehydrogenase A

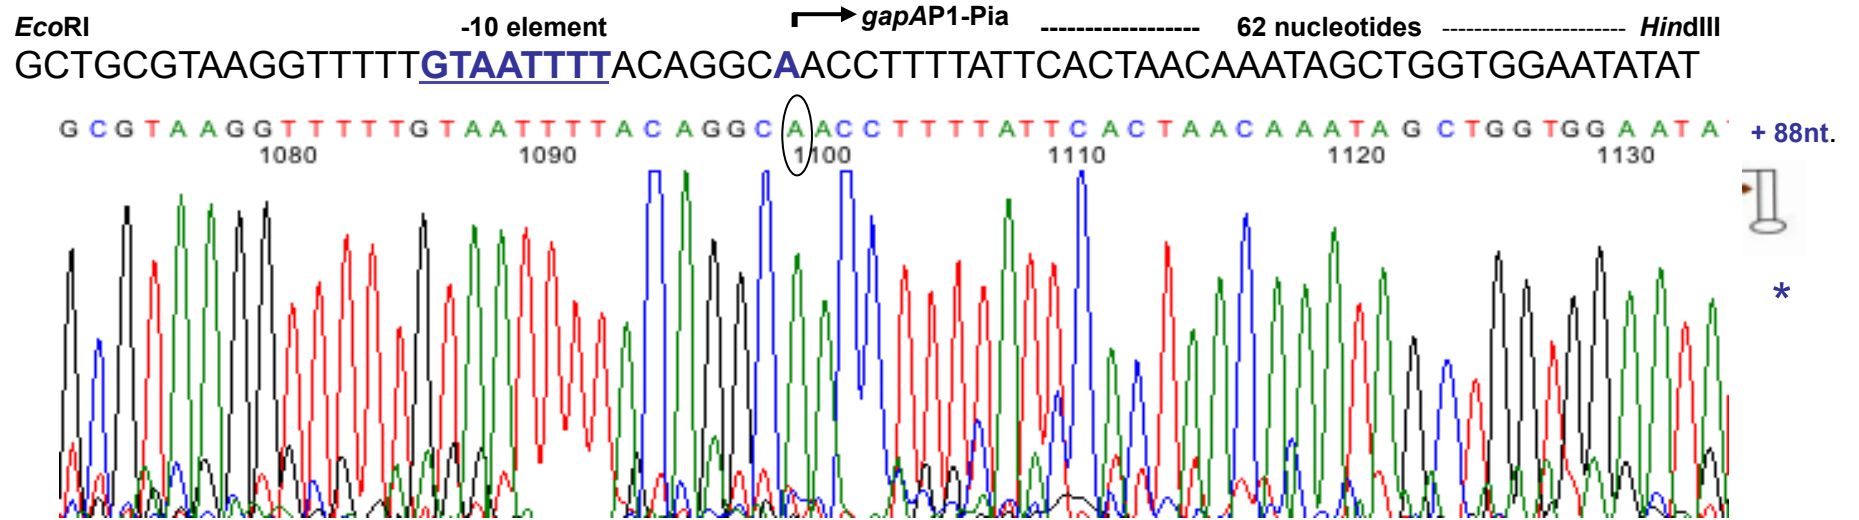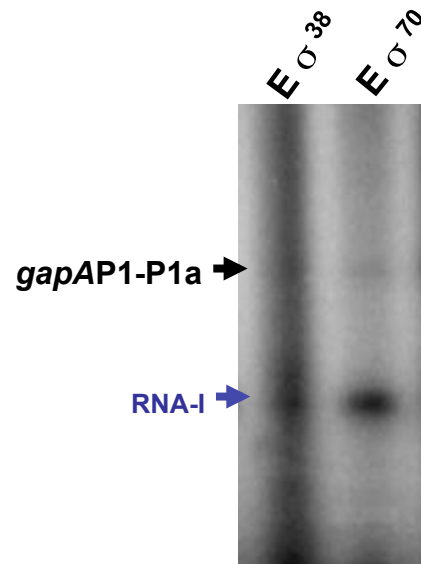





**g. *pdhR* Transcriptional regulator of the pyruvate dehydrogenase**

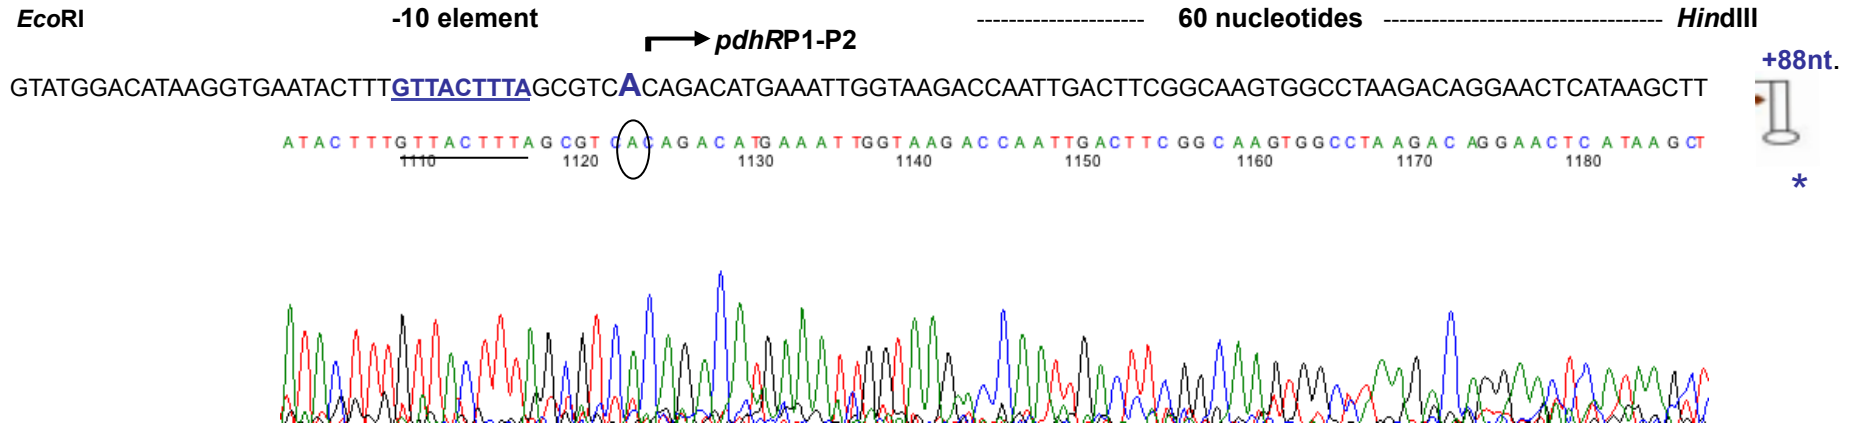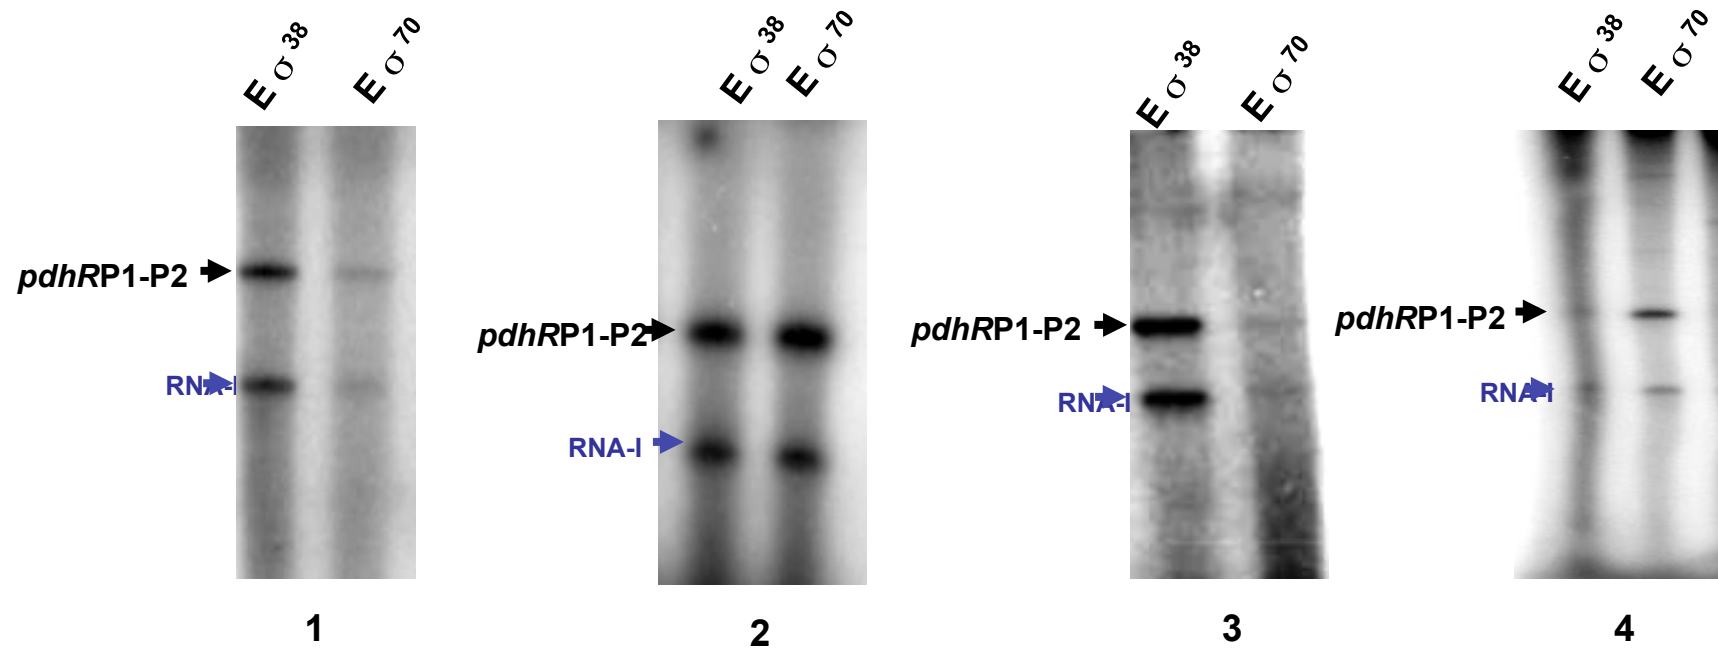





i. *acs* Acetyl-CoA synthase

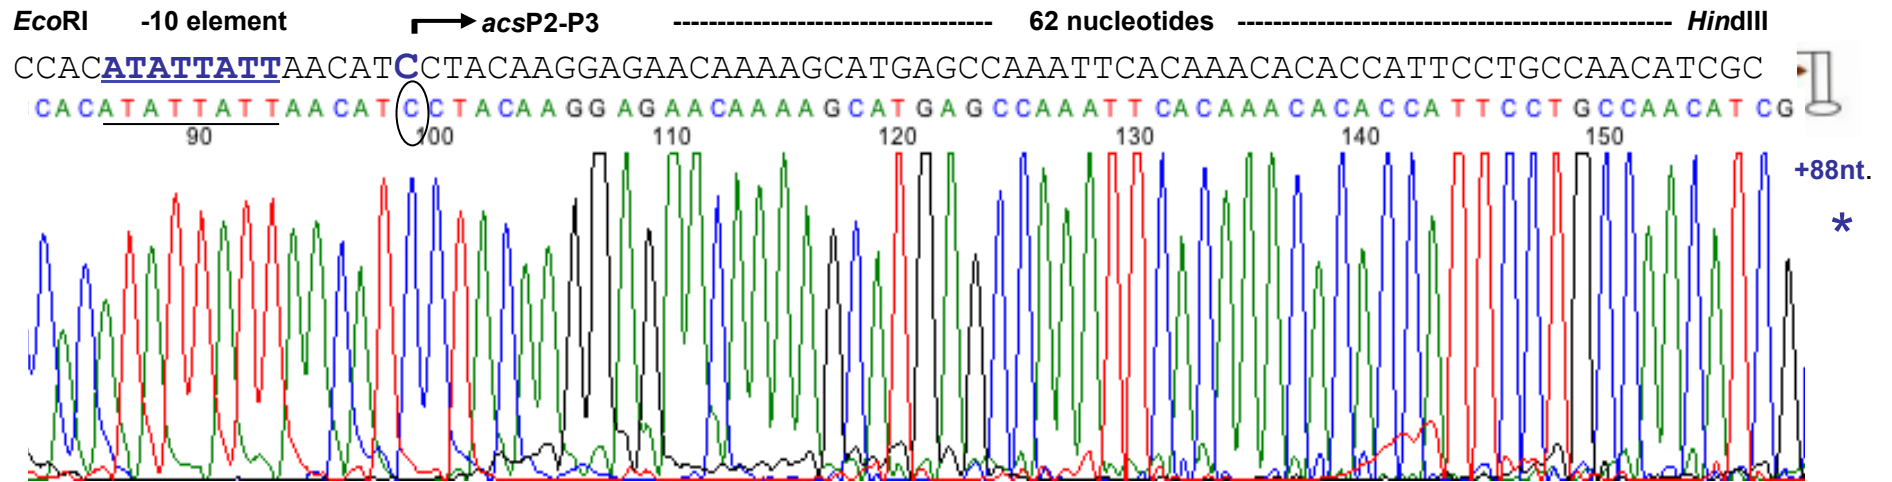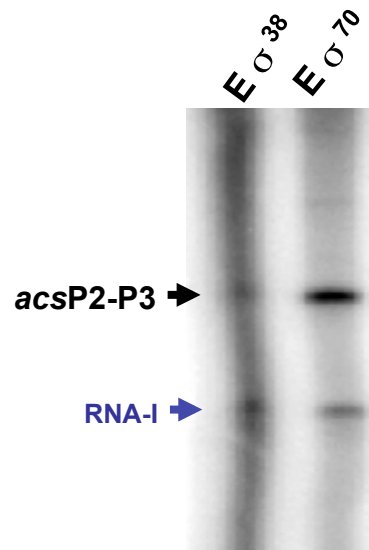

Supplement: pone.0007466.s002.pdf [file pone.0007466.s002.pdf]
