# Supplementary material for: Transcription Analysis of Central Metabolism Genes in Escherichia coli. Possible Roles of σ38 in Their Expression, as a Response to Carbon Limitation
Source: PubMed Central journal article supplement (PMC2759082; doi:10.1371/journal.pone.0007466), 2009-10-19
Supplement: pone.0007466.s001.pdf [file pone.0007466.s001.pdf]

Figure S1

a. *glk* Glucokinase

One of the detected TSSs of the *glk* gene (*glkP1-P2*) is different from one previously reported by one nucleotide (36).

Name: *glkP*  
 +1: 2507483  
 Sequence: `tacaggagcctgccttccggcgtgtgtatgccccaggatttacagtgtagaAagaattttgactttagc`

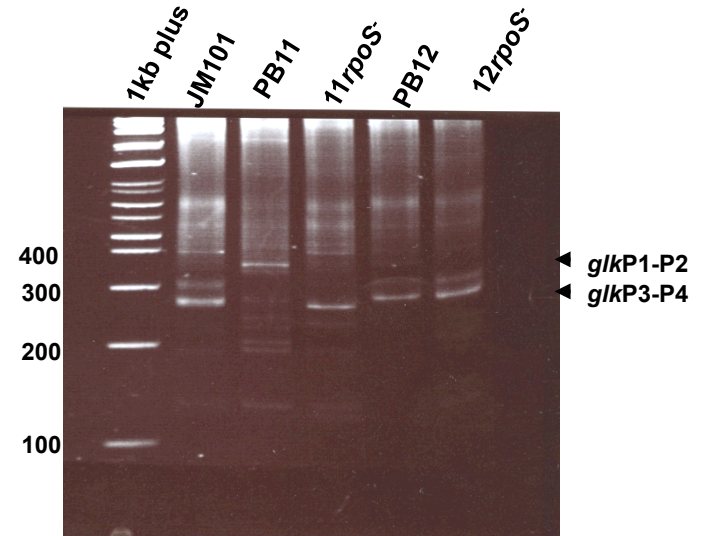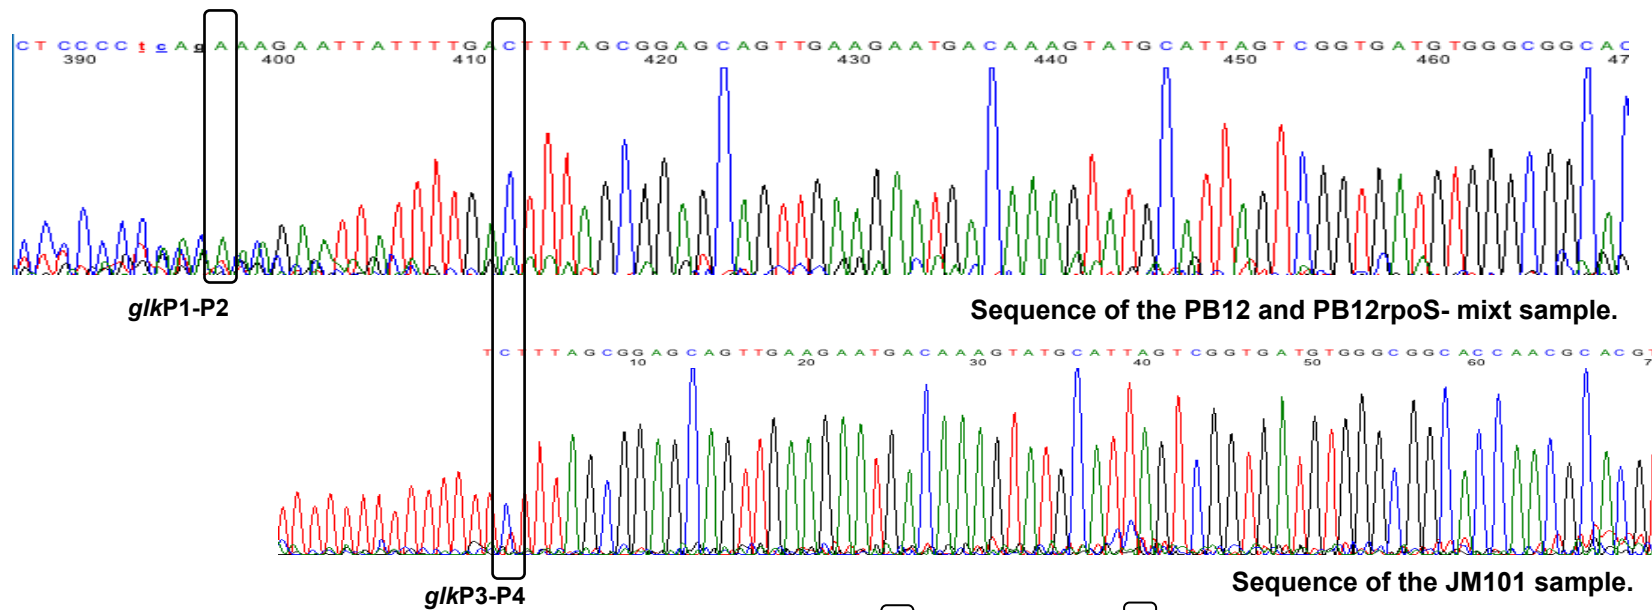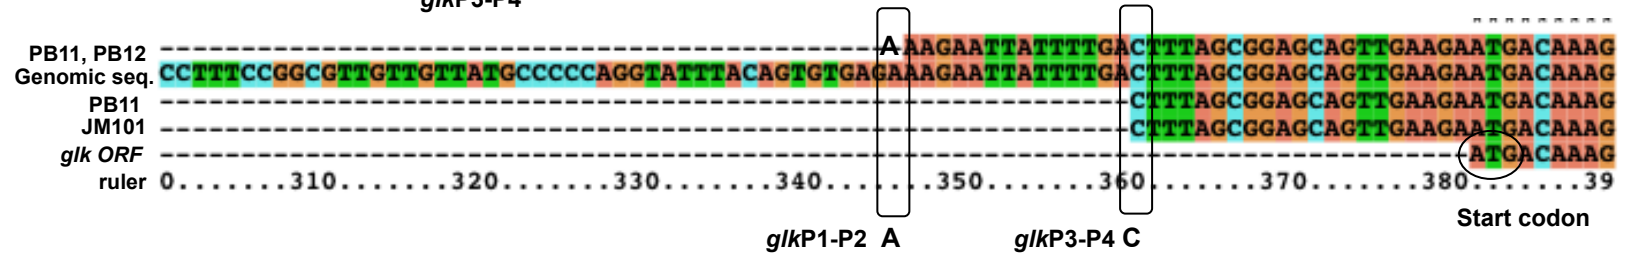

a. *glk* Glucokinase

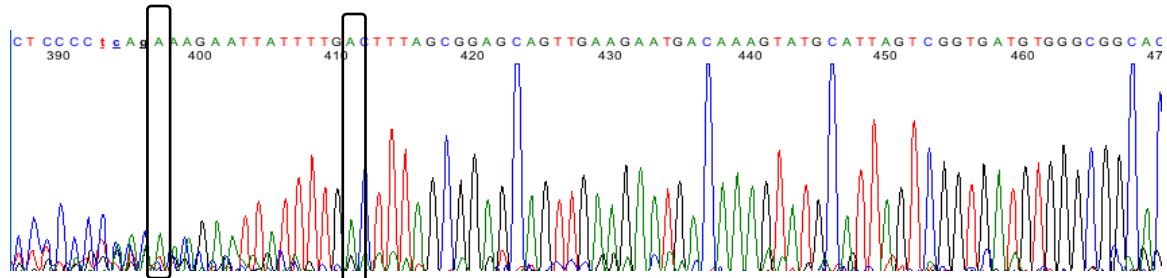

*glkP1-P2* A

Sequence of the PB12 and PB12rpoS- mixt sample.

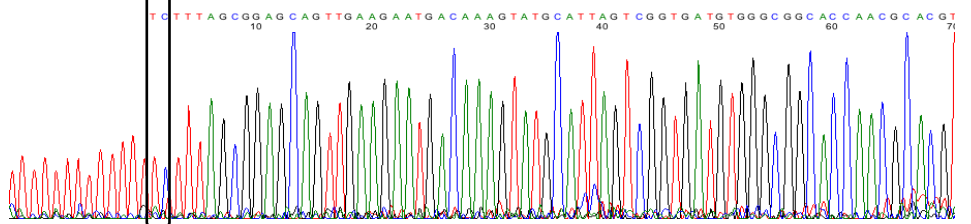

*glkP3-P4* C

Sequence of the JM101 sample.

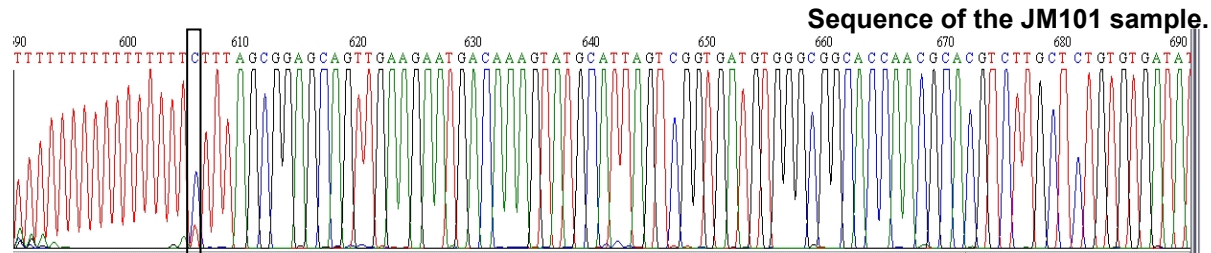

Sequence of the JM101 sample.

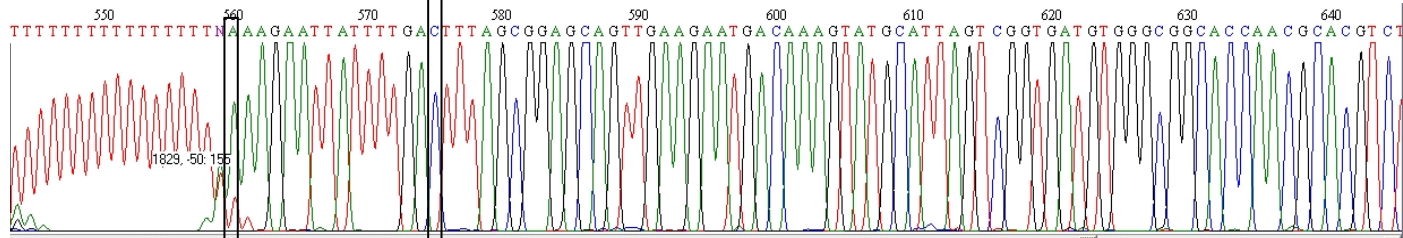

Sequence of the JM101 sample.

*glkP1-P2* A

*glkP3-P4* C

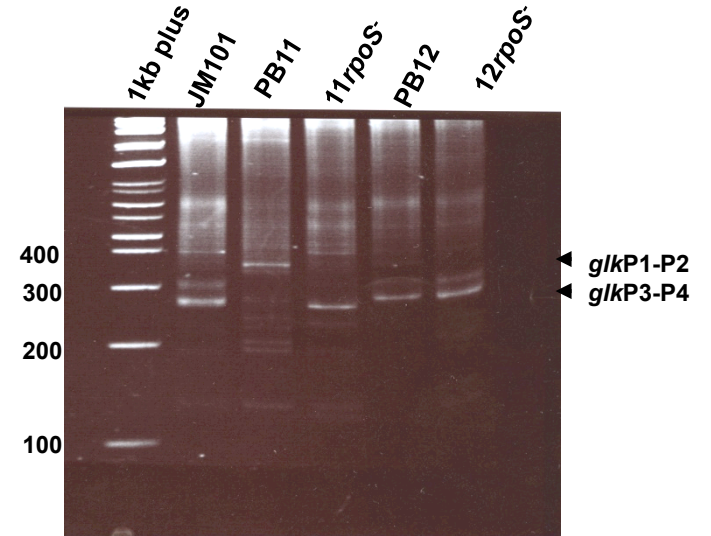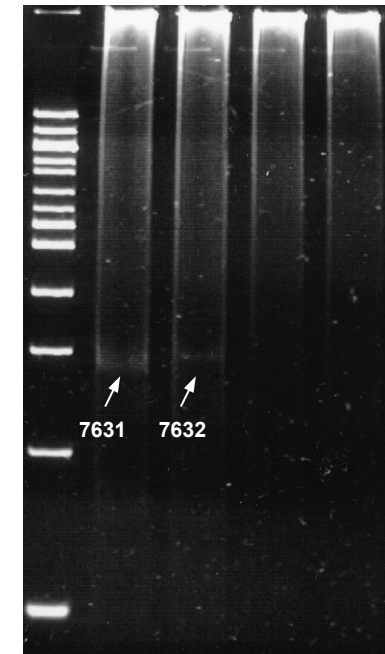

b. *pgi* Glucosephosphate isomerase

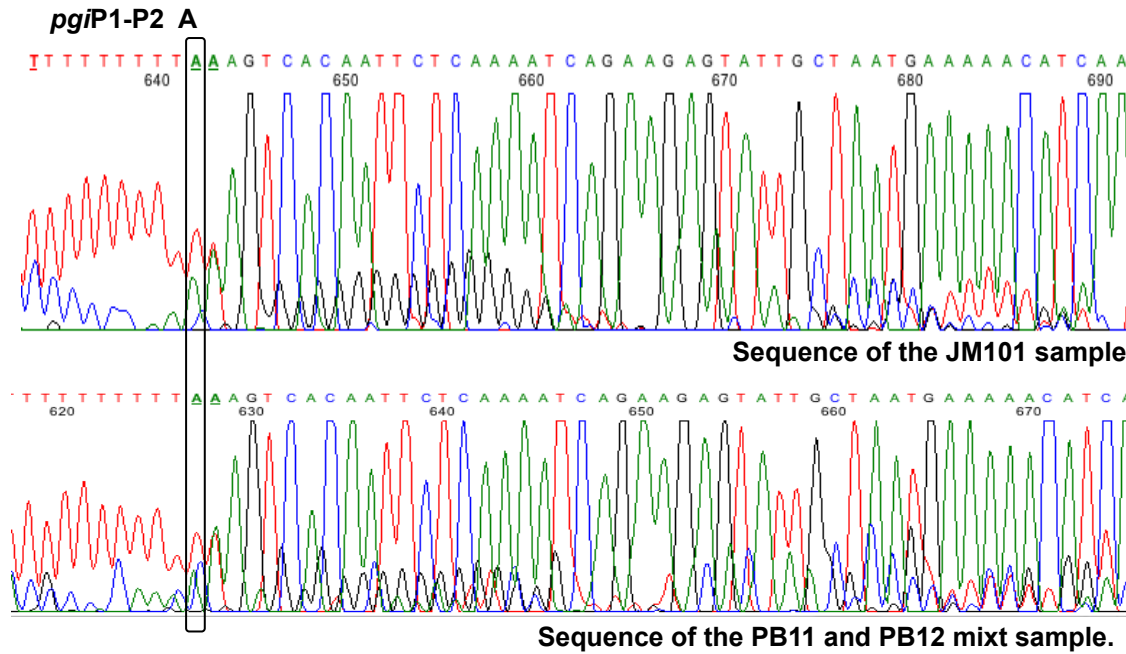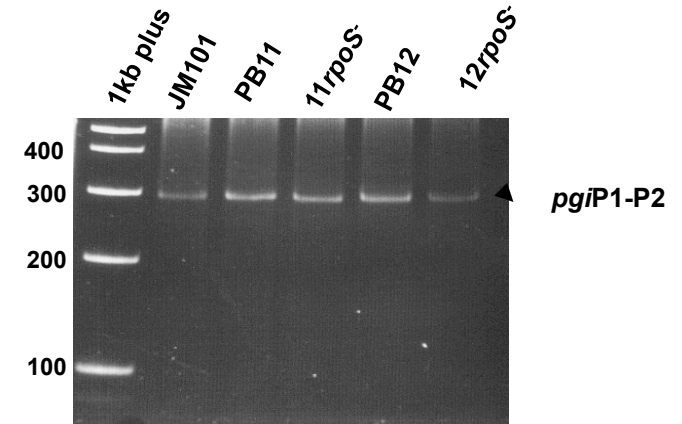

The detected TSS of the *pgi* gene is the same as the one previously reported (37).

|                  |                                                                                 |
|------------------|---------------------------------------------------------------------------------|
| <b>Name:</b>     | <i>pgip</i>                                                                     |
| <b>+1:</b>       | 4231745                                                                         |
| <b>Sequence:</b> | acattacgctaacggcactaaaaccatcacattttctgtgactggcgctacaatcttccAaagtcacaattctcaaatc |

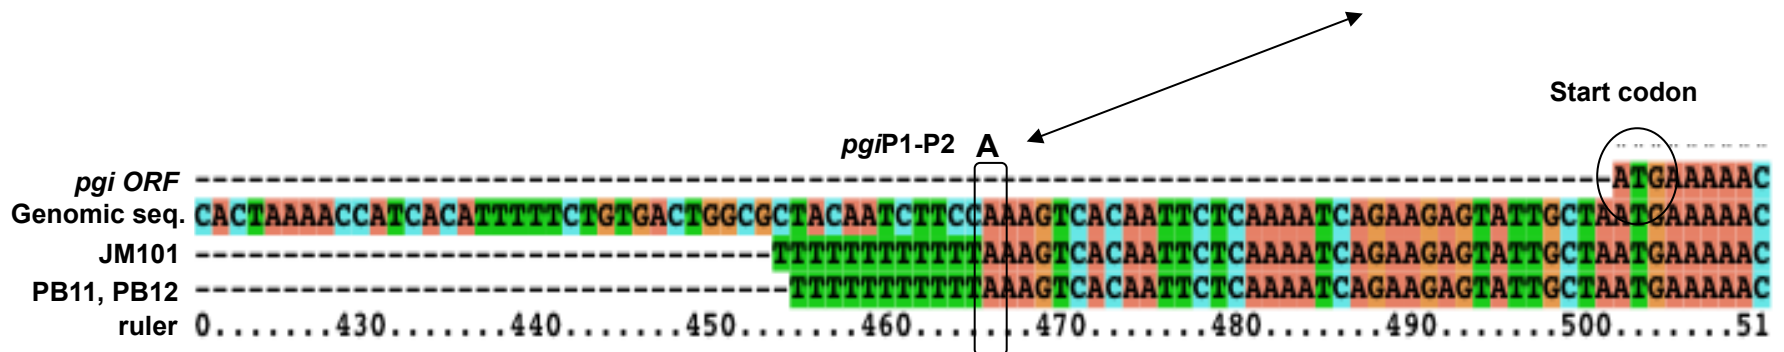

c. *pfkA* 6-Phosphofructokinase I

Name: *pfkAp2*  
 +1: 4105497  
 Sequence: accgccatttggcctgacctgaatcaattcagcaggaagtgattgttatactatttgcacAAttcgt

One of the detected TSSs of the *pfkA* gene (*pfkAP1-P2*) is the same as the one previously reported (39).

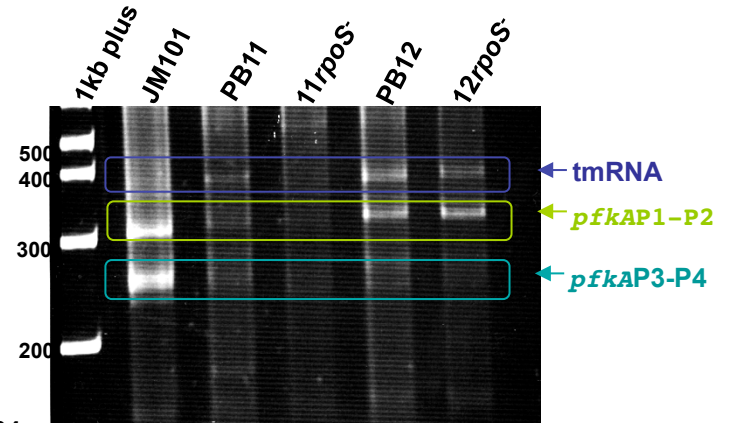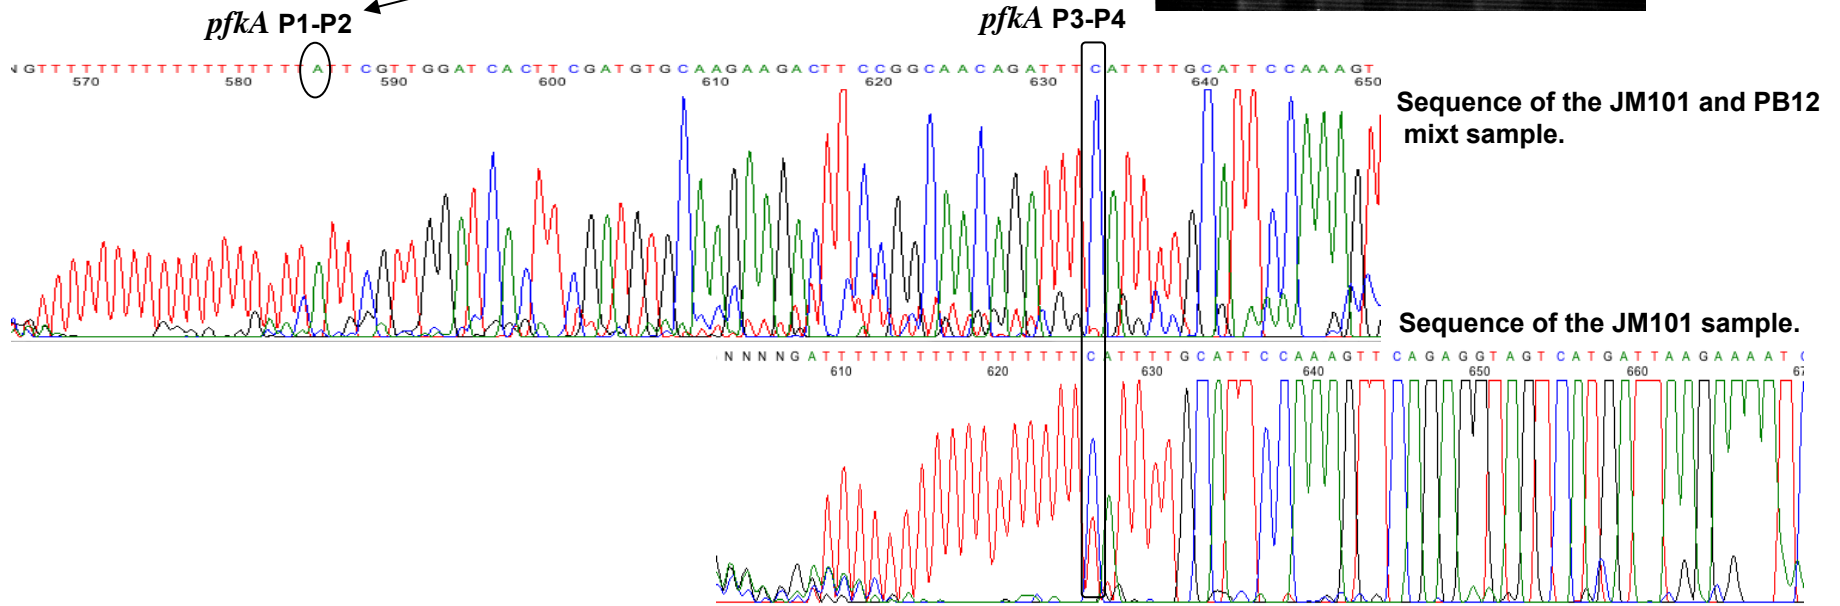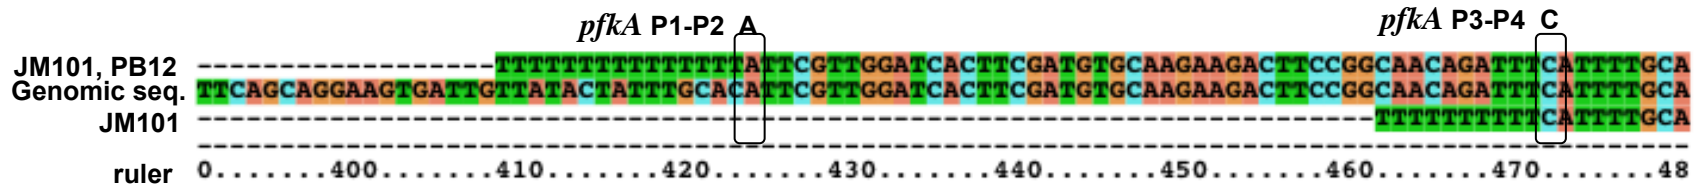



### c. *pfkA* 6-phosphofructokinase I

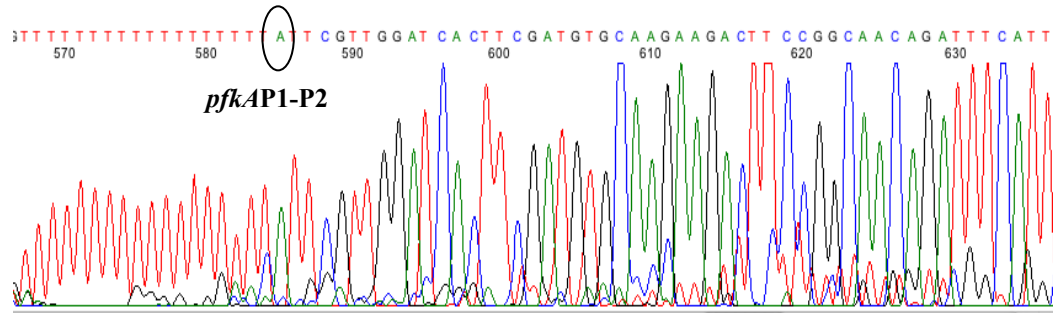

Sequence of the JM101 and PB12 mixt sample.

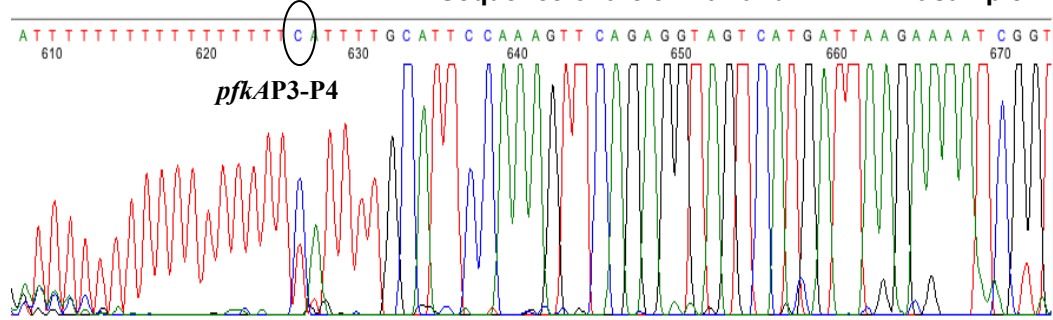

Sequence of the JM101 sample.

Two independent experiments were performed for this gene.

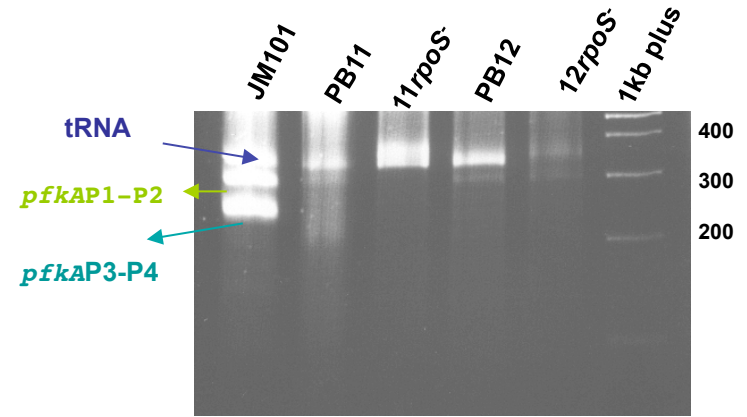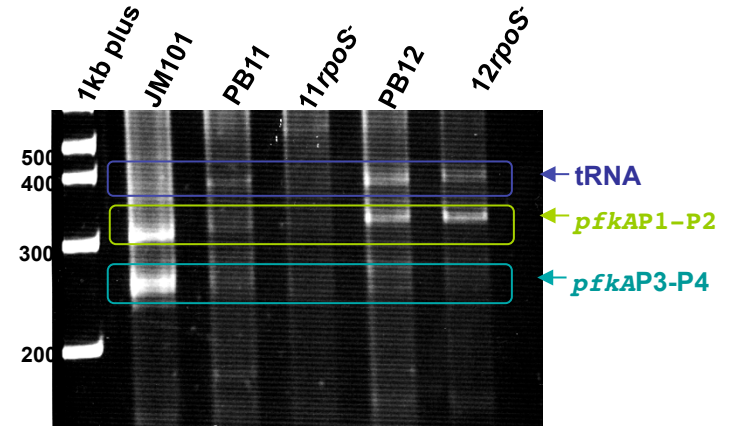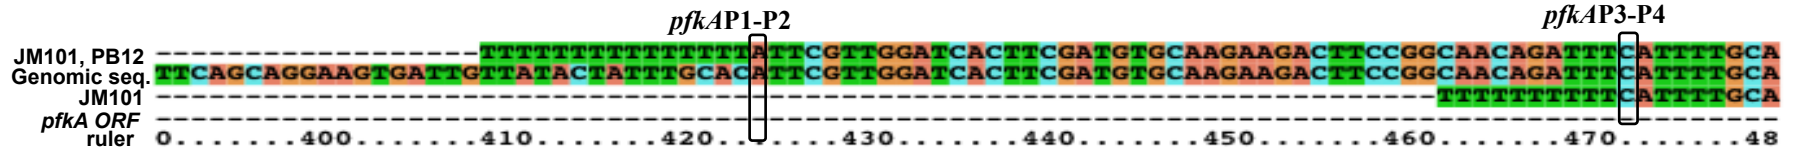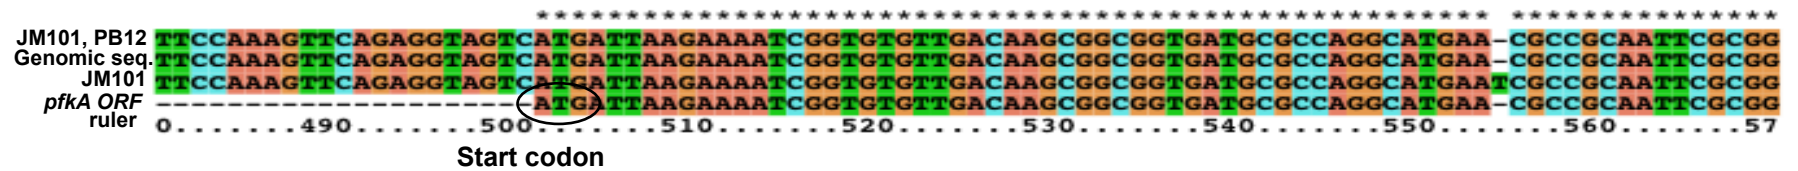

d. *tpiA* Triosephosphate isomerase

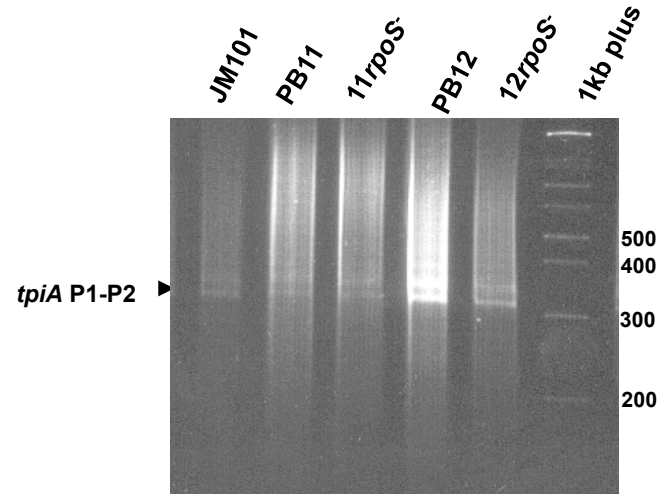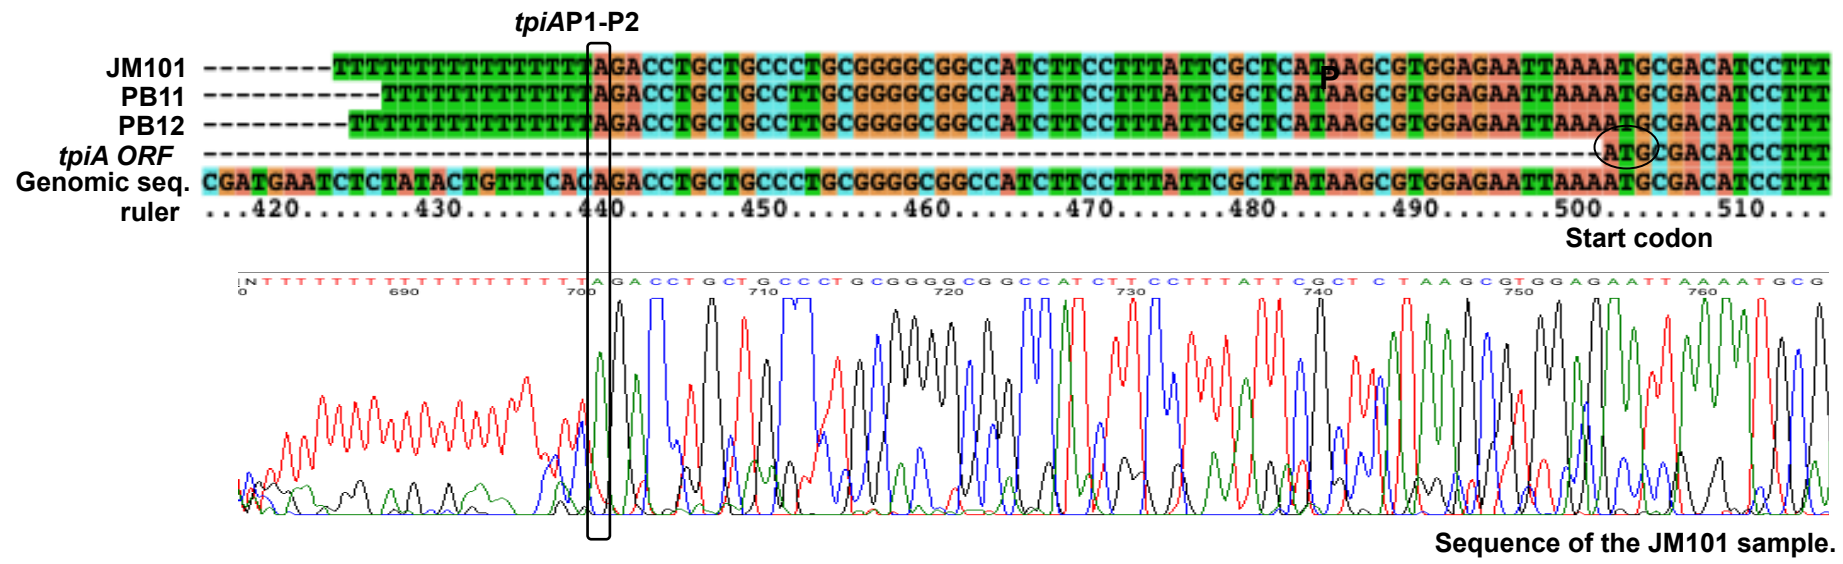

A previously reported TSS of the *tpiA* gene was not detected (40).

Name: *tpiAp*  
 +1: 4109547  
 Sequence: tctatactgtttcacagacctgctgccttgcggggcggccatcttcctttattcgcttataagcgtggagaattaaa



e. *gapA* Glyceraldehyde 3-phosphate dehydrogenase A

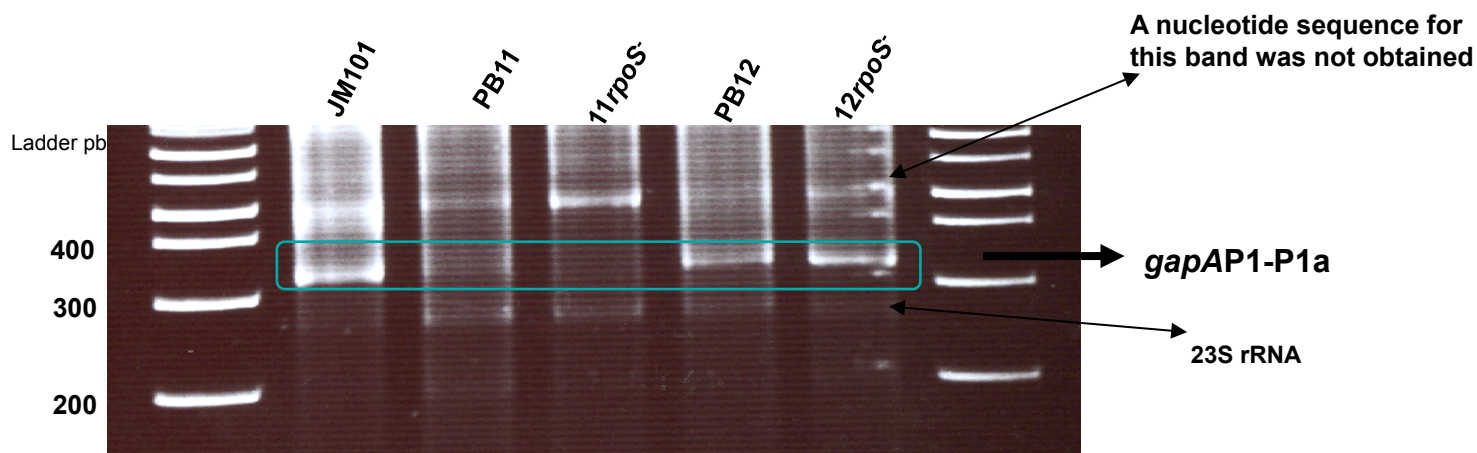

The detected TSS of the *gapA* gene is the same as one previously reported (41,43).

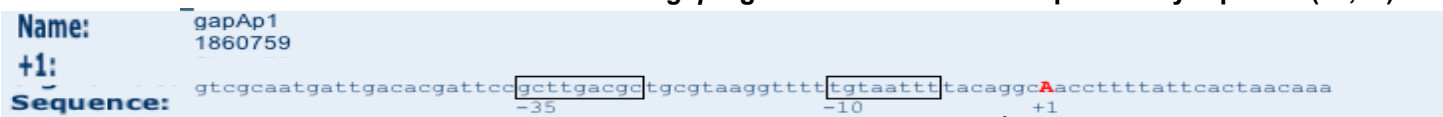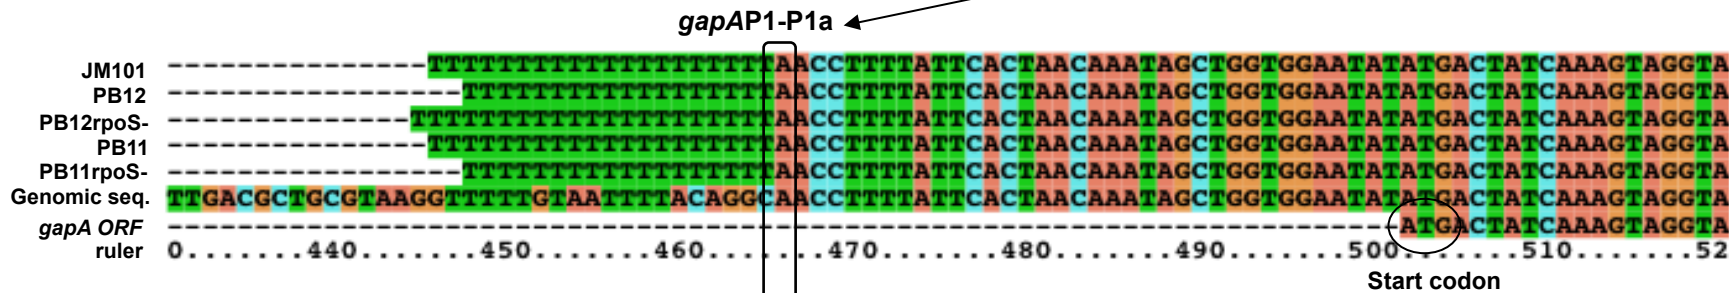

Sequence of the JM101 sample.

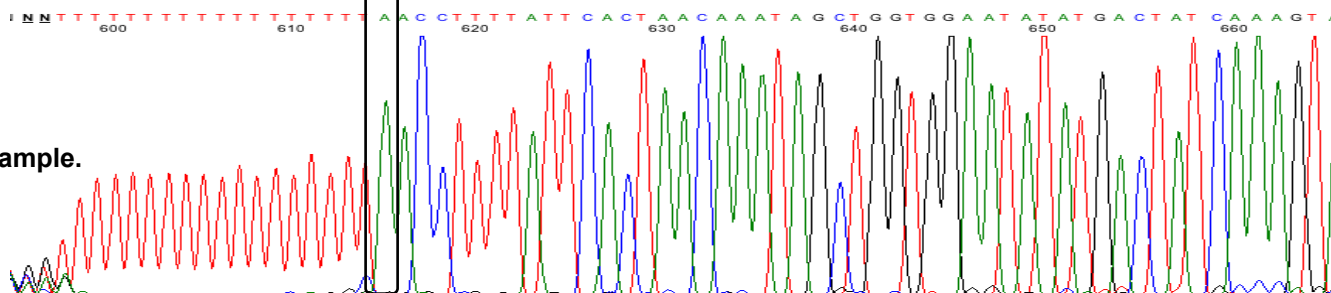



e. *gapA* Glyceraldehyde 3-phosphate dehydrogenase A

*gapAP1-P1a*

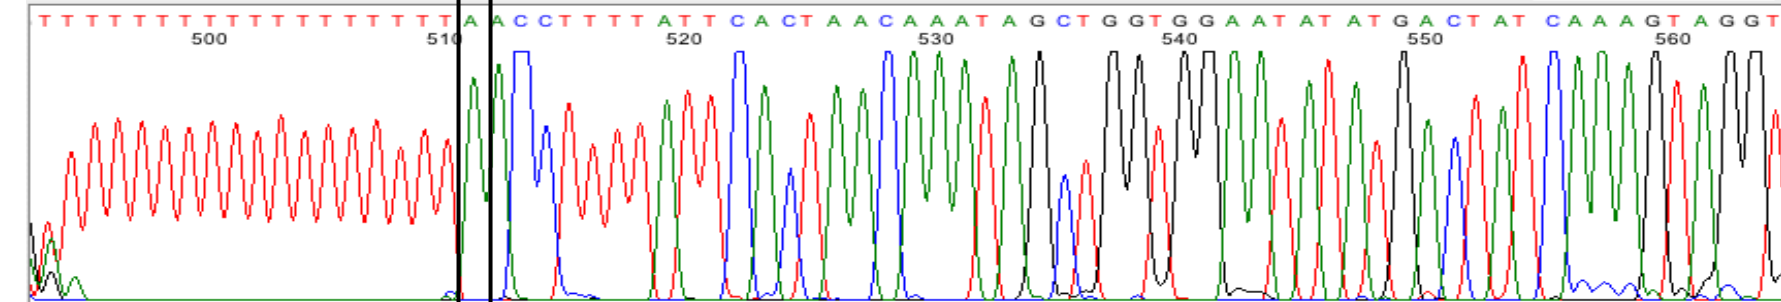

TTTTTTTTTTTTTTTTTTTTTTTAAACCTTTTATTCACTAACAAATAGCTGGTGGAAATATATGACTATCAAAGTAGGT

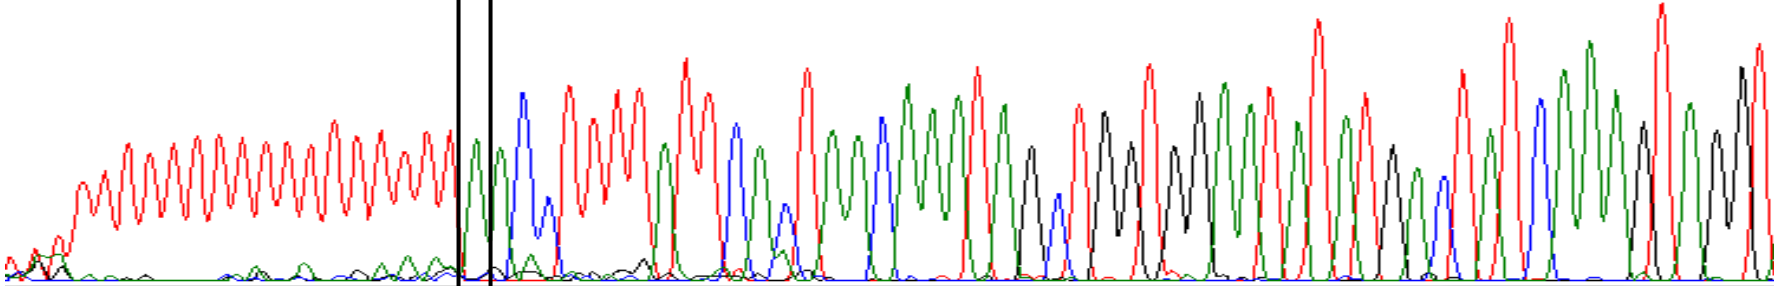

NTTTTTTTTTTTTTTTTTTTTTTAAACCTTTTATTCACTAACAAATAGCTGGTGGAAATATATGACTATCAAAGTAGGT

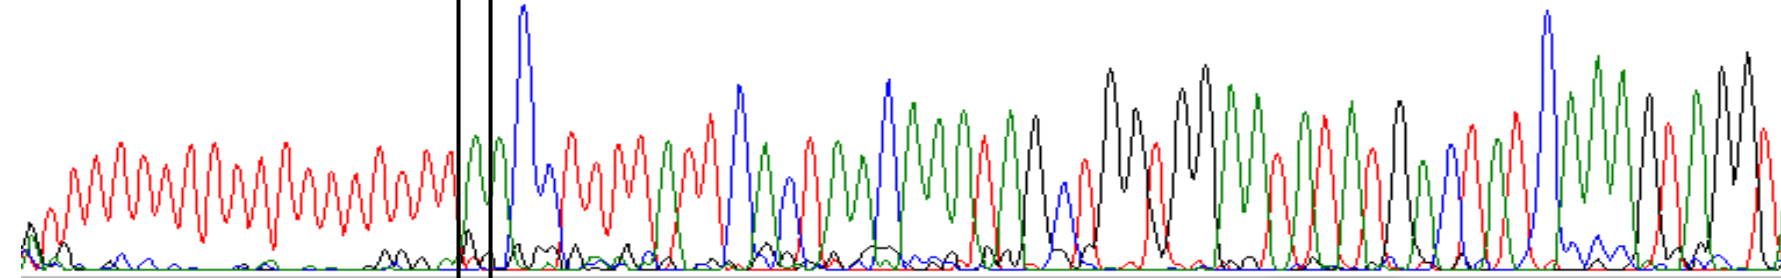

*gapAP1-P1a*

f-1. *epd* D-erythrose 4-phosphate dehydrogenase

The detected TSS of the *epd* gene is the same as the one previously reported (45).

Name: *epd*  
 3071845  
 +1: aatgtcttcttcggtggacaaaacatttcctttttattccaacgttttcgcttatcccttagctgaAagcgtttcagtcgatta  
 Sequence: -35 -10 +1

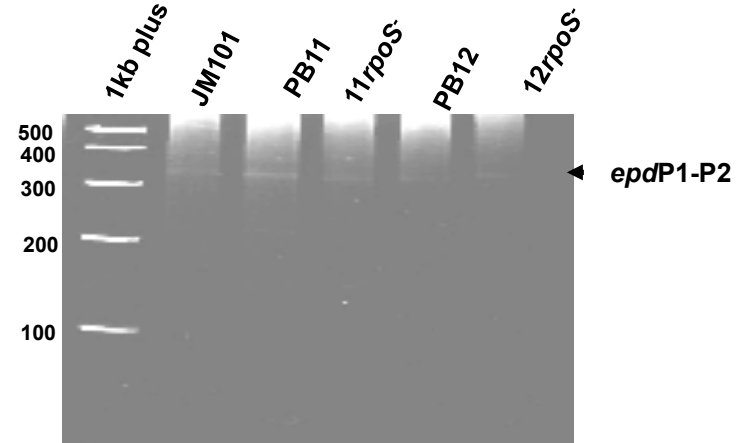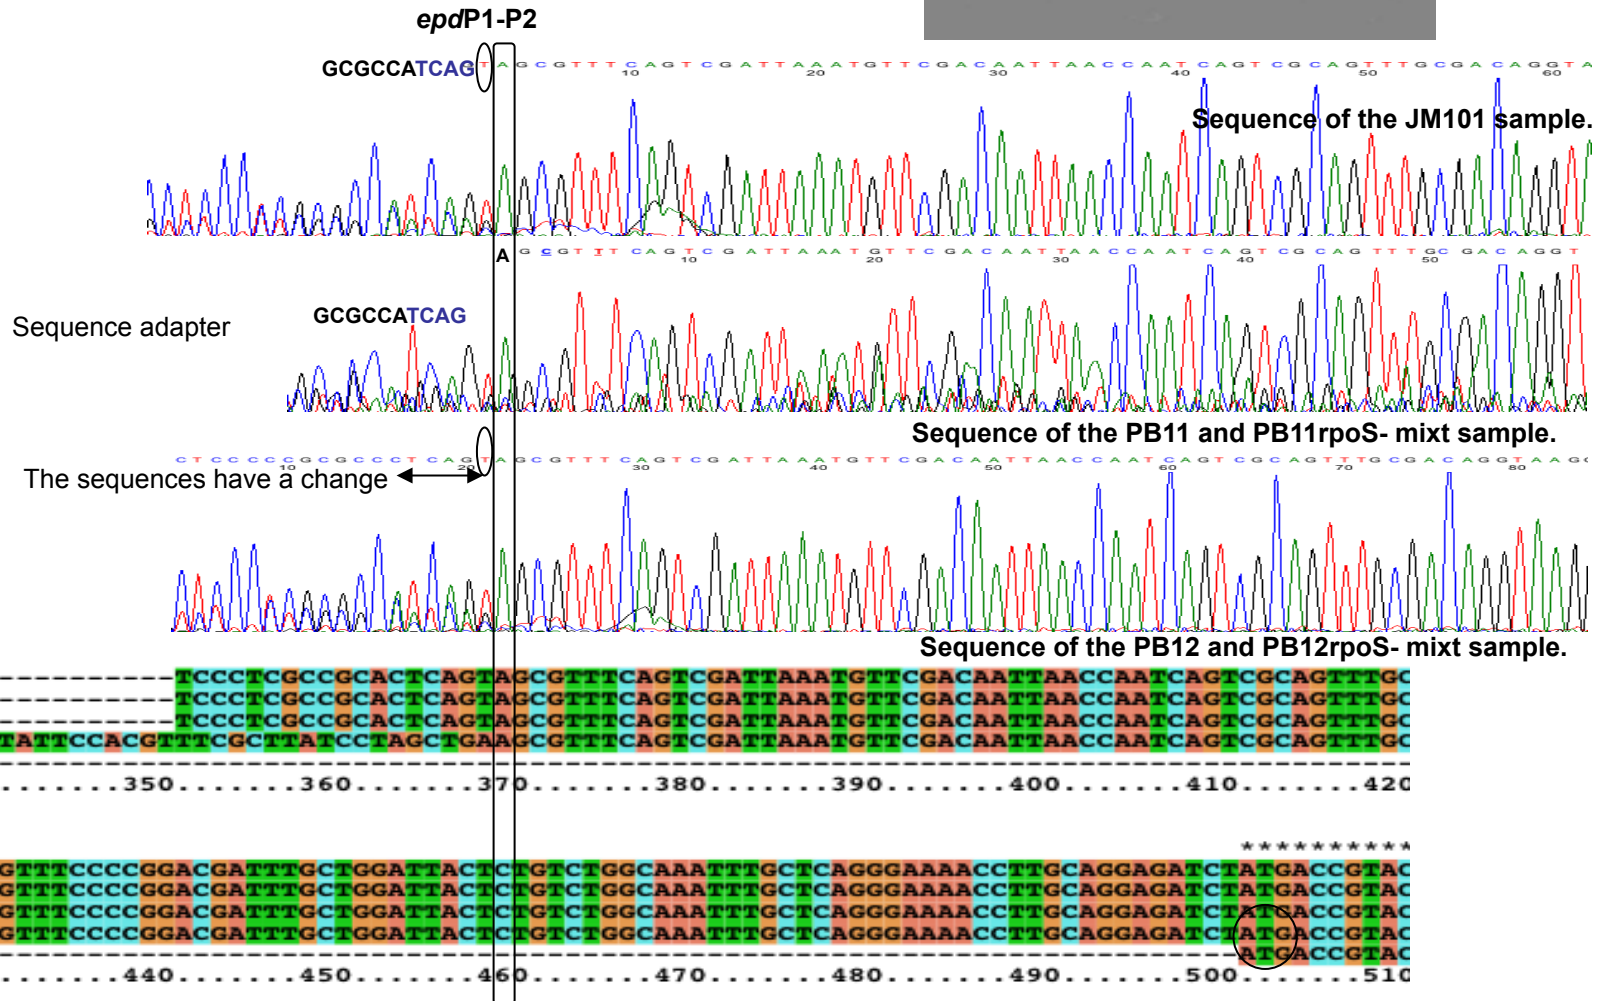

f-2. *pgk*, Phosphoglycerate kinase.

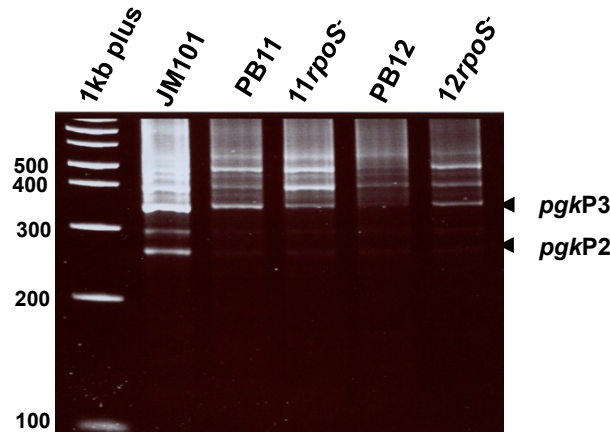

A previously reported TSS of the *pgk* gene was not detected (45).

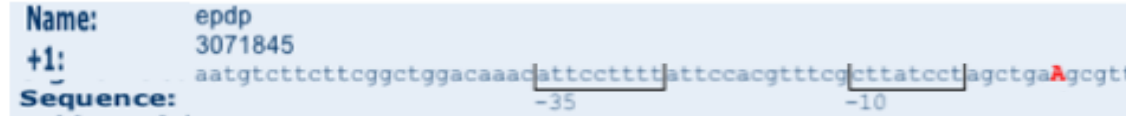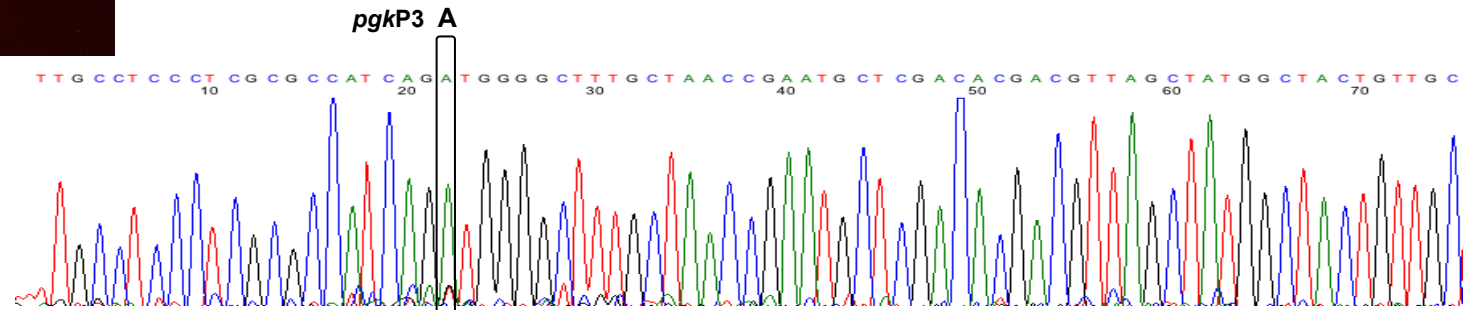

Sequence of the PB11 and PB12 mixt sample

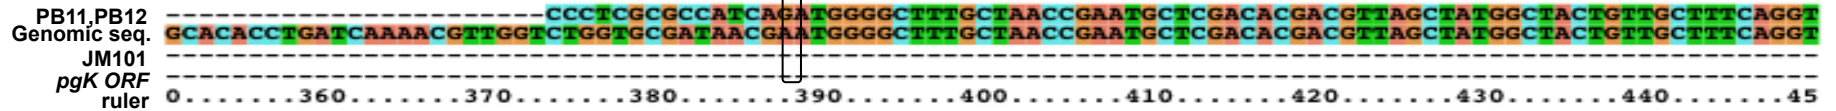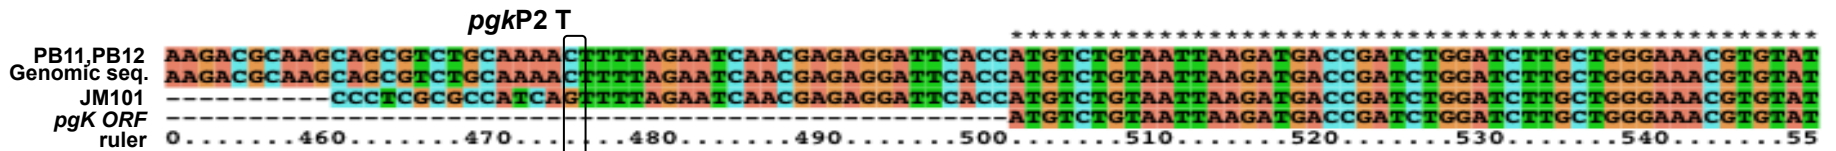

Sequence of the JM101 sample.

**g. *gpmA* Phosphoglyceromutase A**

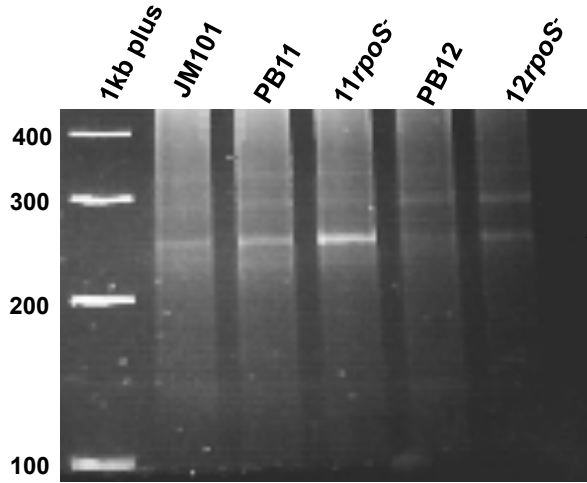

One of the detected TSSs of the *gpmA* gene is different from one previously inferred by two nucleotides (46).

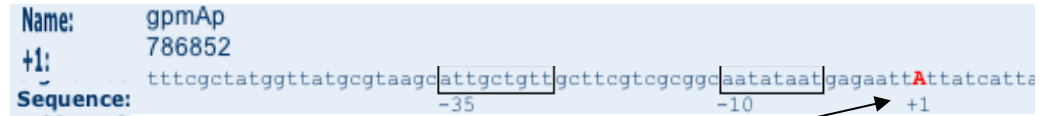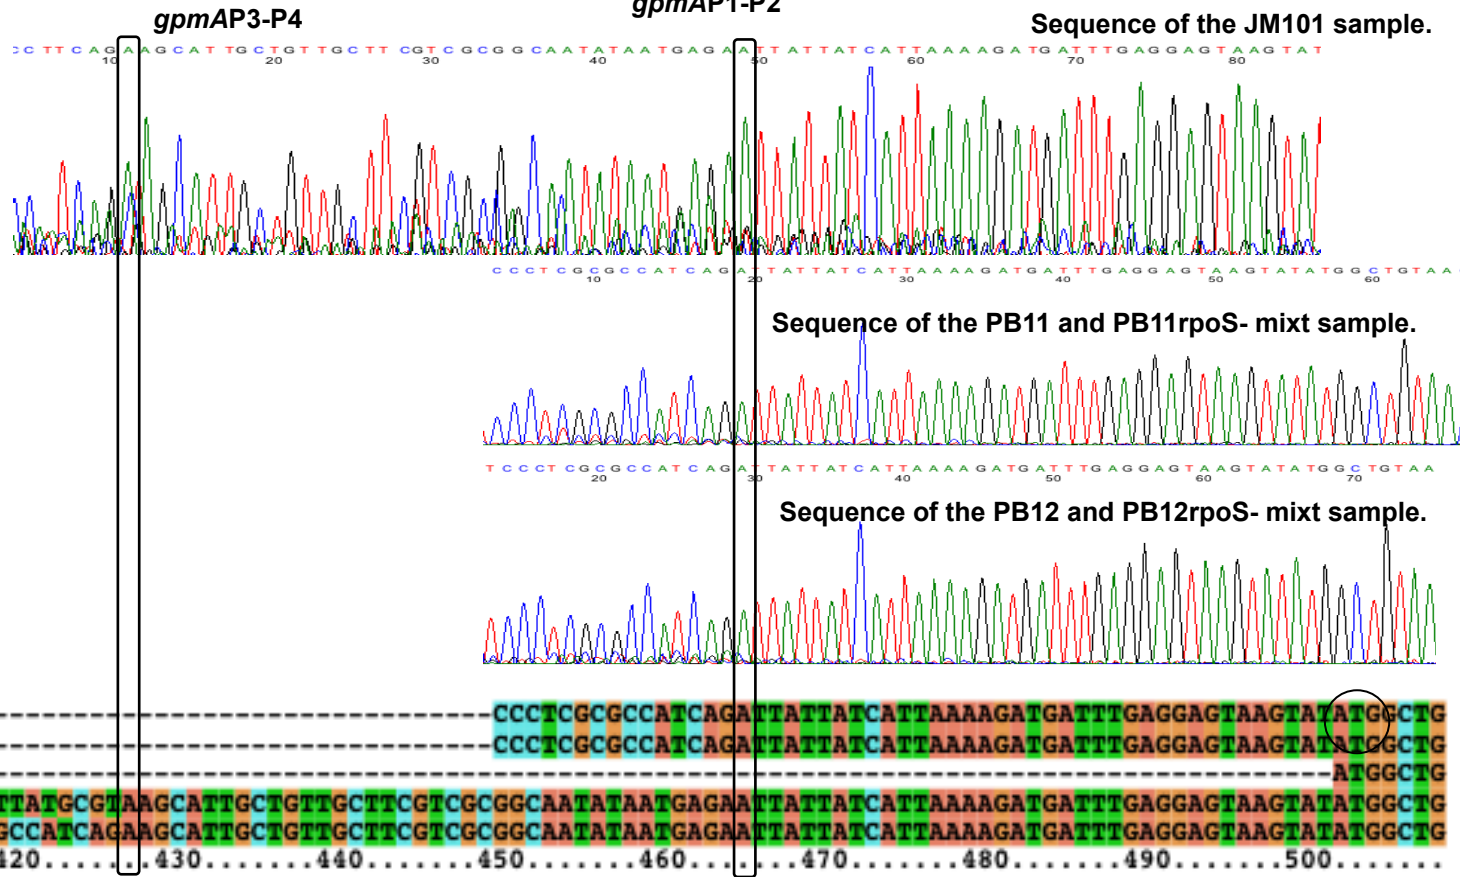



# h. eno Enolase

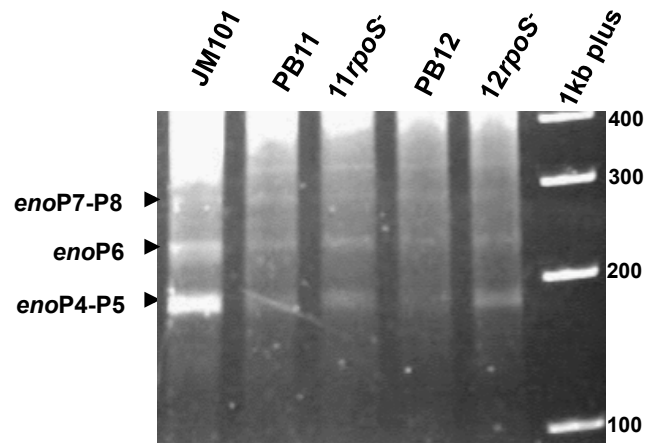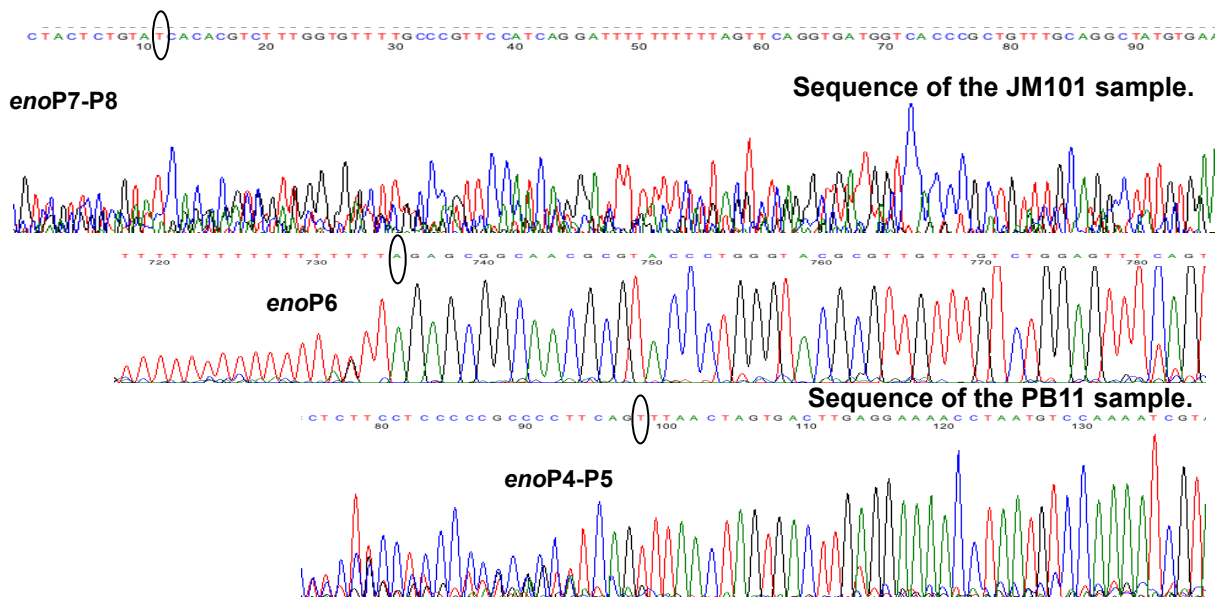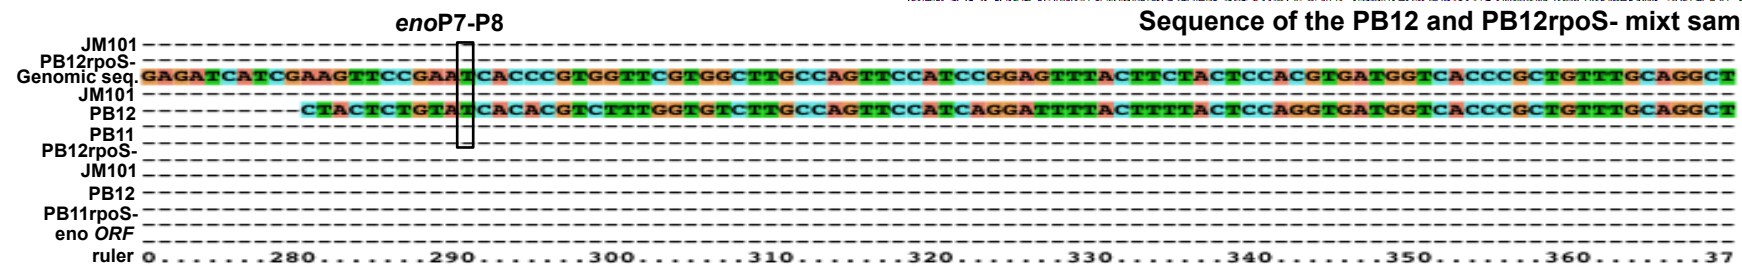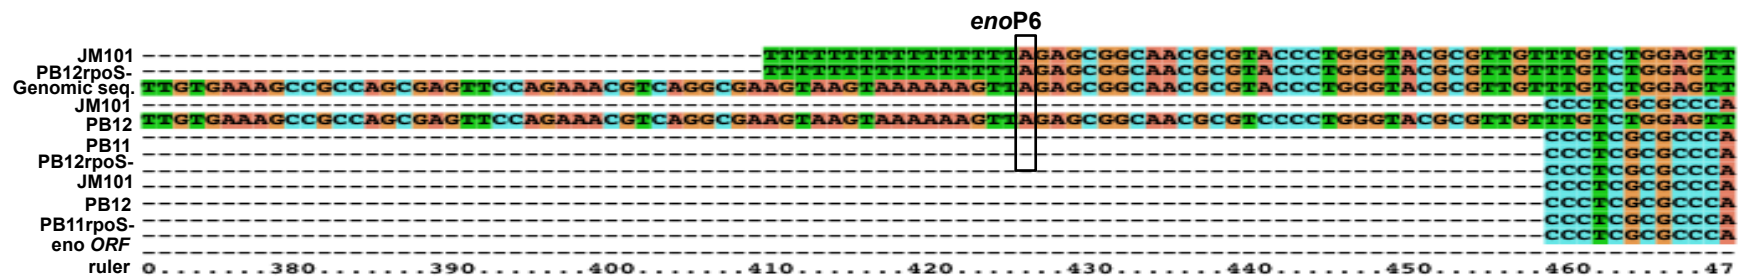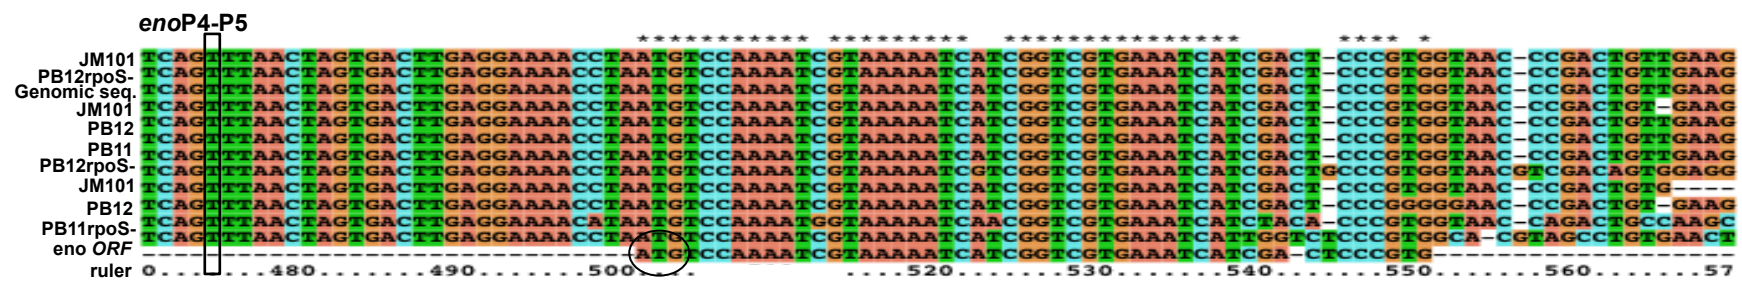

# h.1. *eno* Enolase

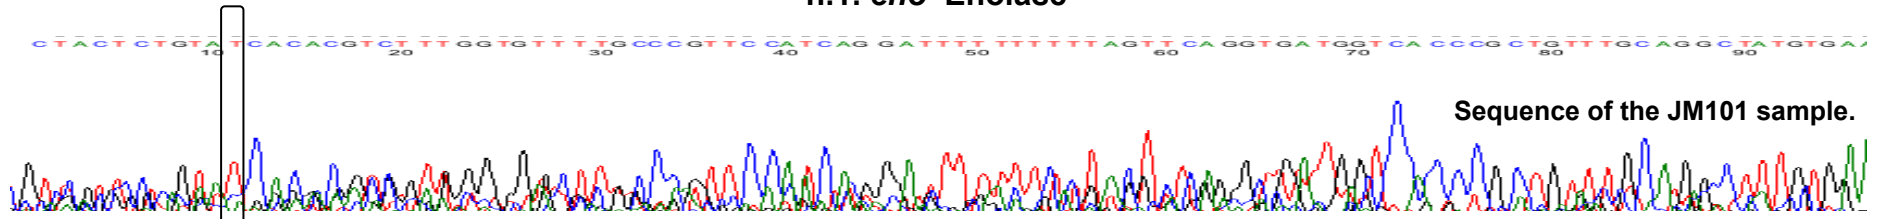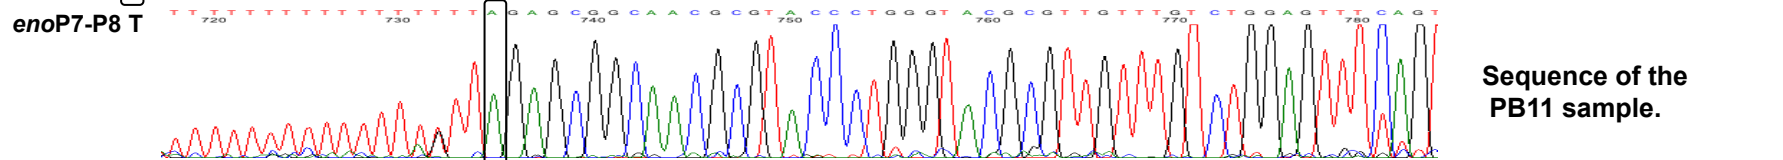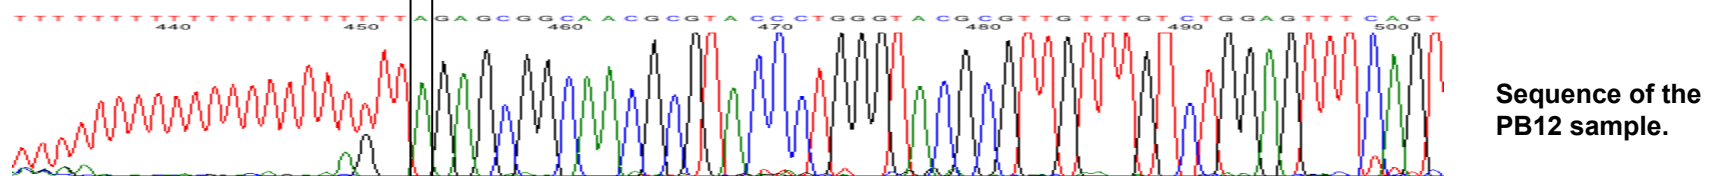

*eno*P6 A

*eno*P4-P5 T

Sequence of the PB11 and PB11*rpoS*- mixt sample.

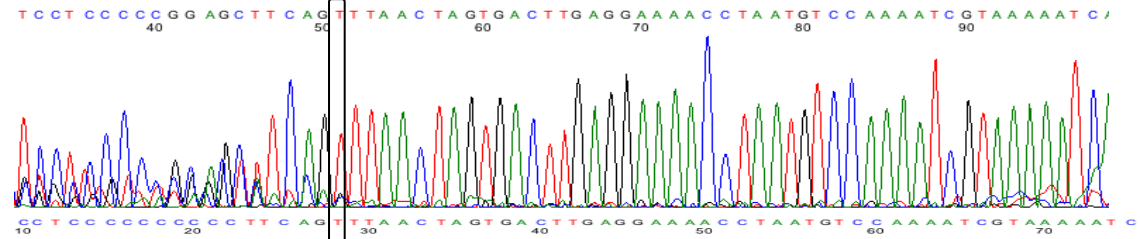

Sequence of the JM101 sample.

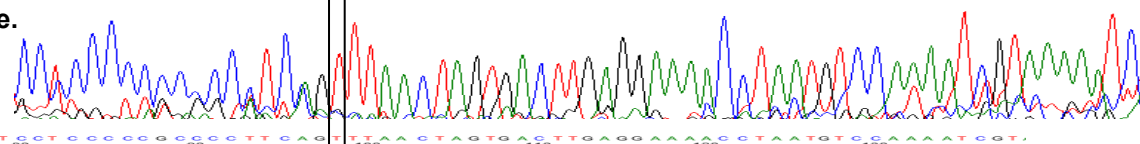

Sequence of the PB12 and PB12*rpoS*- mixt sample.

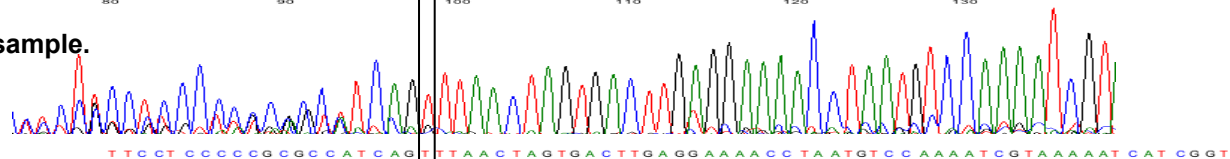

Sequence of the JM101 sample.

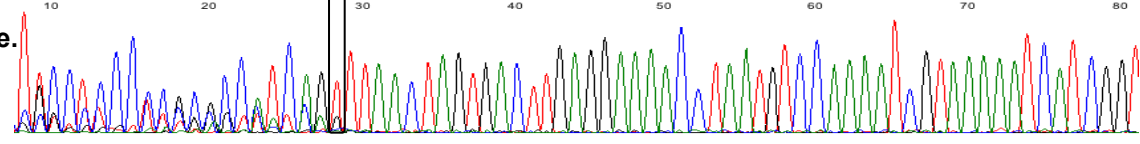

## h.2 *eno* Enolase

Four independent experiments for this gene produced the same results.

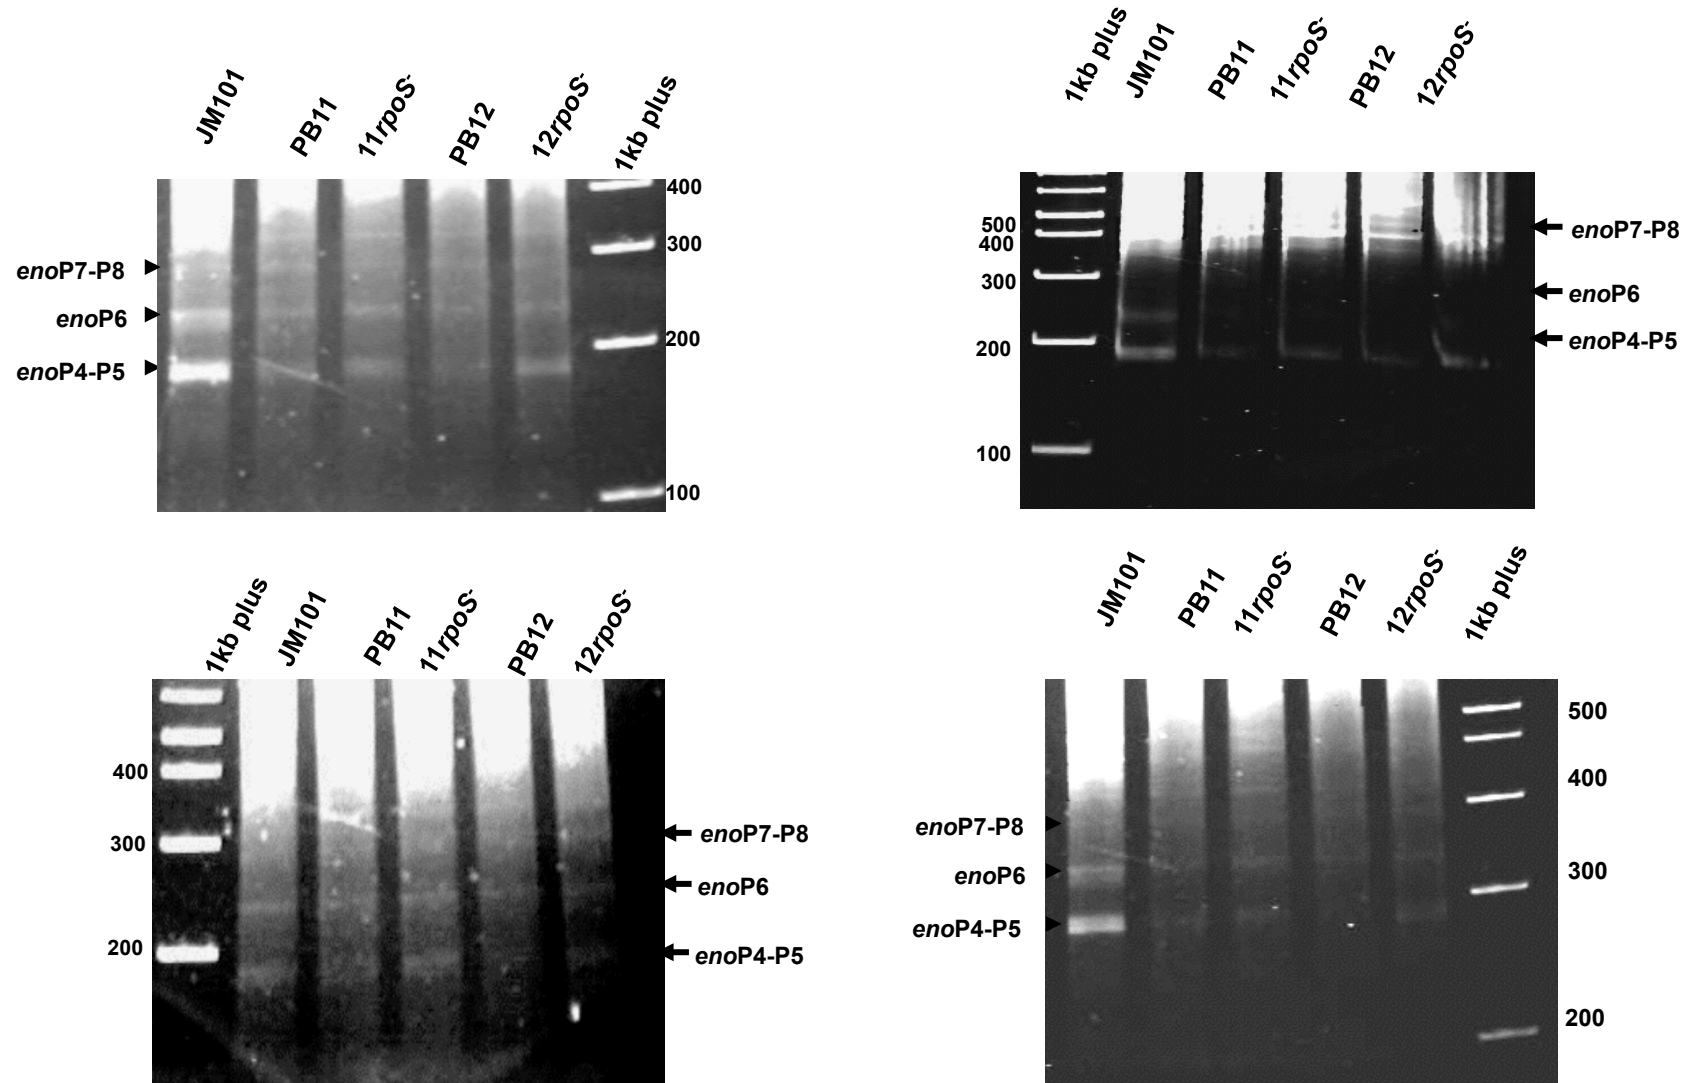

Three previously reported TSSs for this gene with long untranslated regions were not detected (47).





i-2 *pykA* Pyruvate kinase A

Two independent experiments produced the same results.

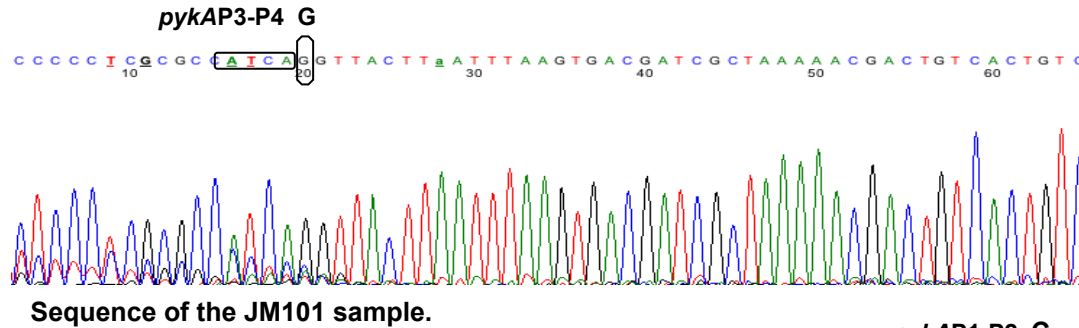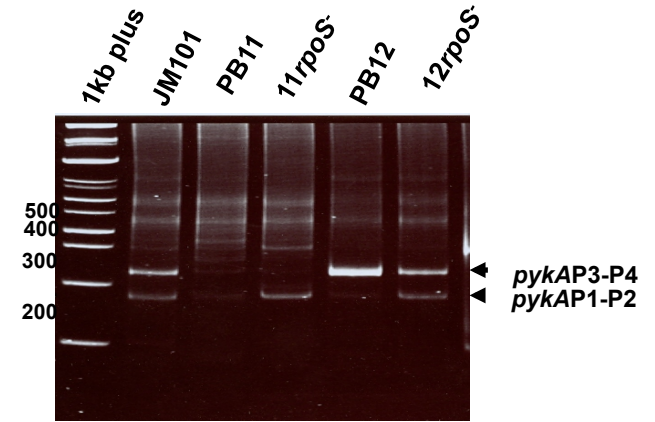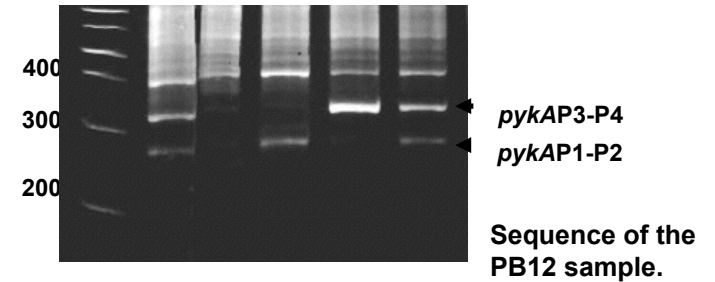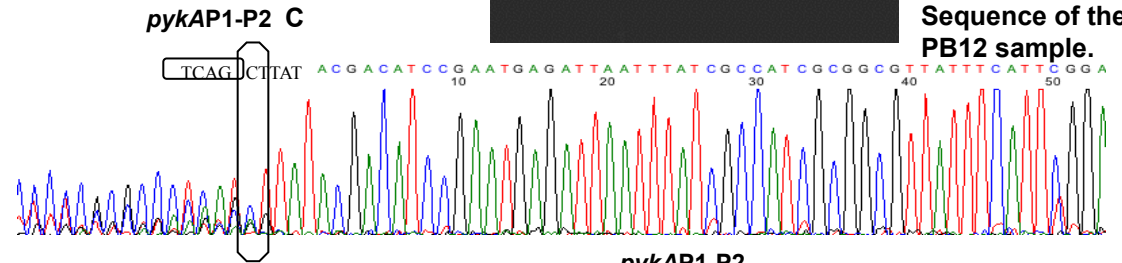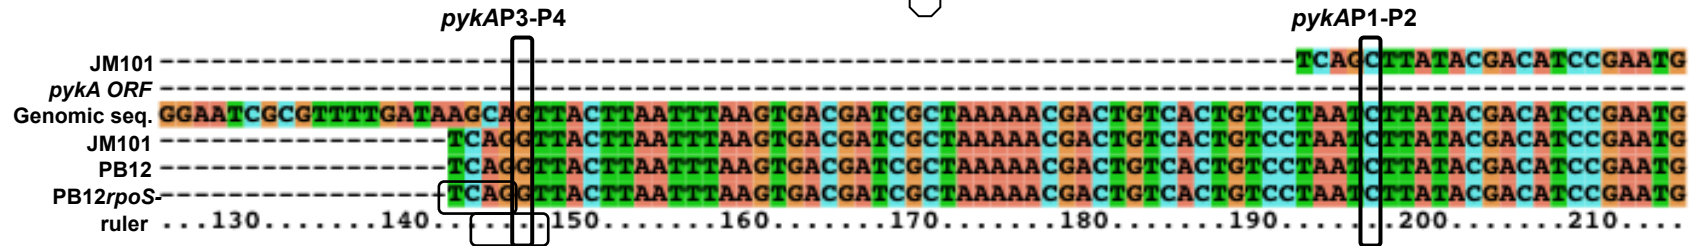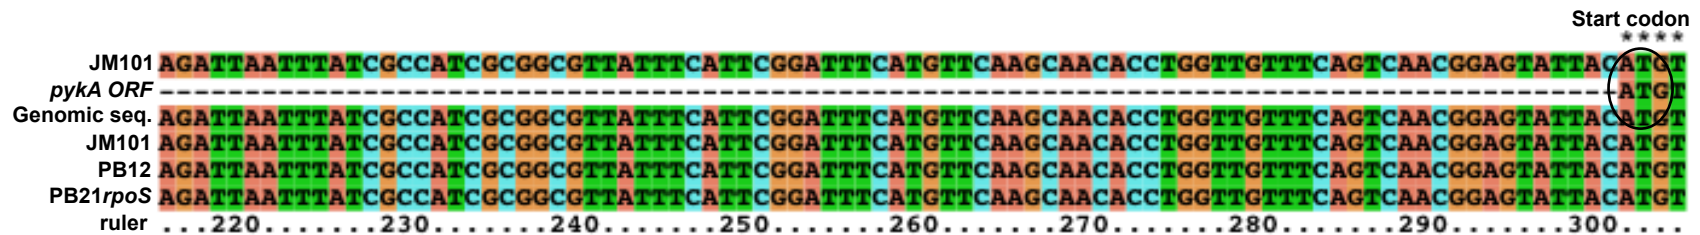

i-2 *pykA* Pyruvate kinase A

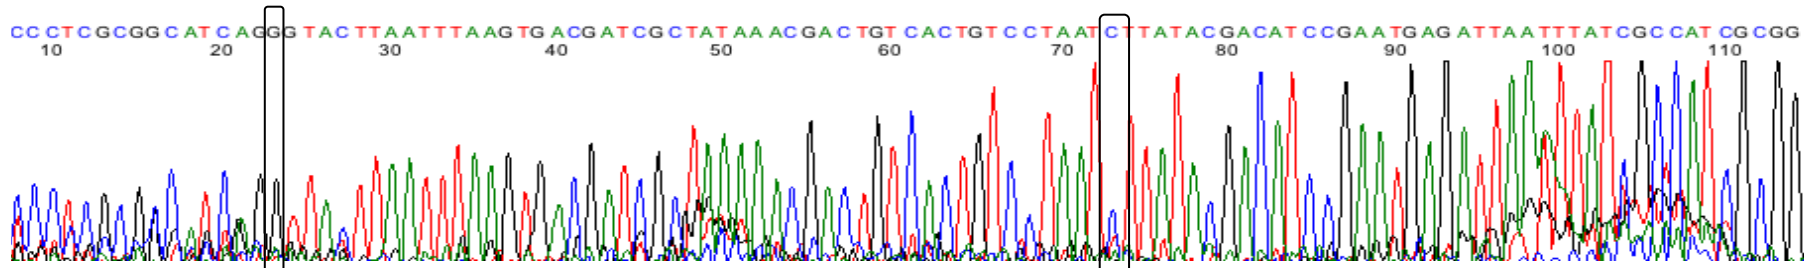

Sequence of the JM101 sample.

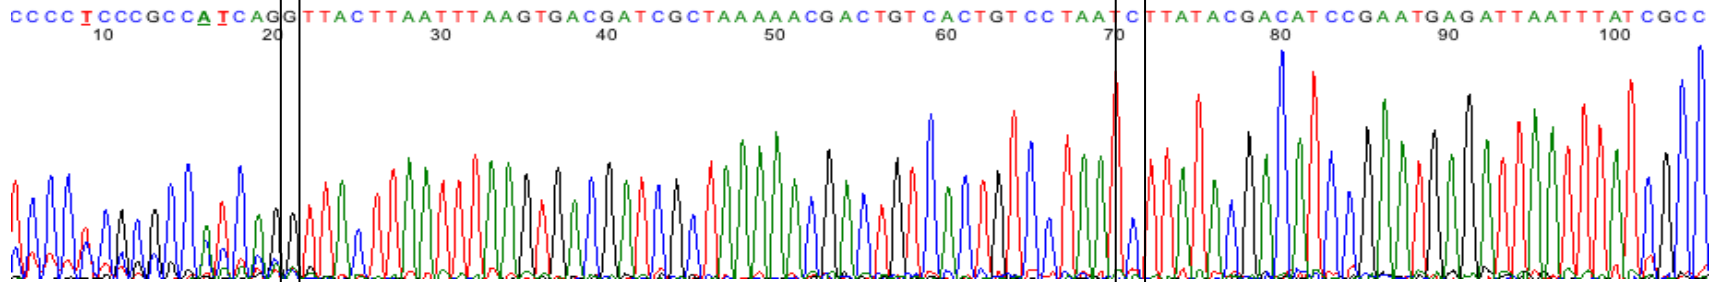

Sequence of the PB12 sample.

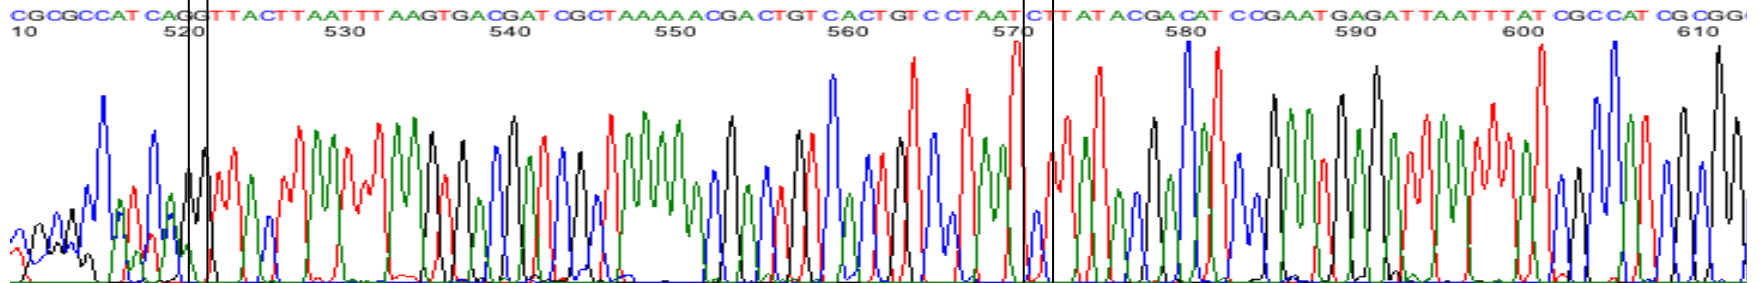

Sequence of the PB12 and PB12rpoS- mixt sample.

ACGACATCCGAATGAGATTAATTTATCGCCATCGCGG  
10 20 30

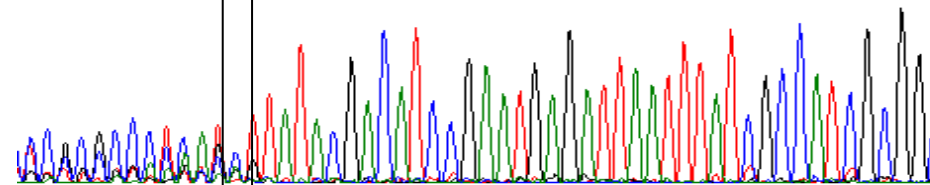

Sequence of the JM101 sample.

*pykAP3-P4* G

*pykAP1-P2* C

j-1 *pdhR* Transcriptional regulator of the Pyruvate dehydrogenase

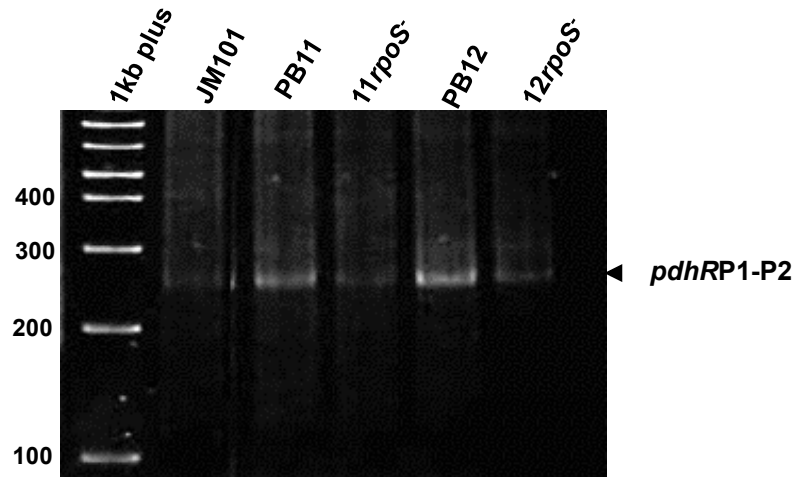

The detected TSS of the *pdhR* gene is the same as the one previously reported (51,52).

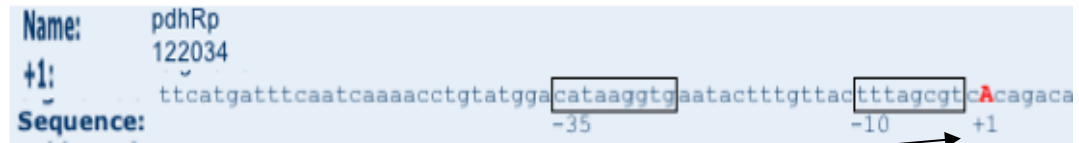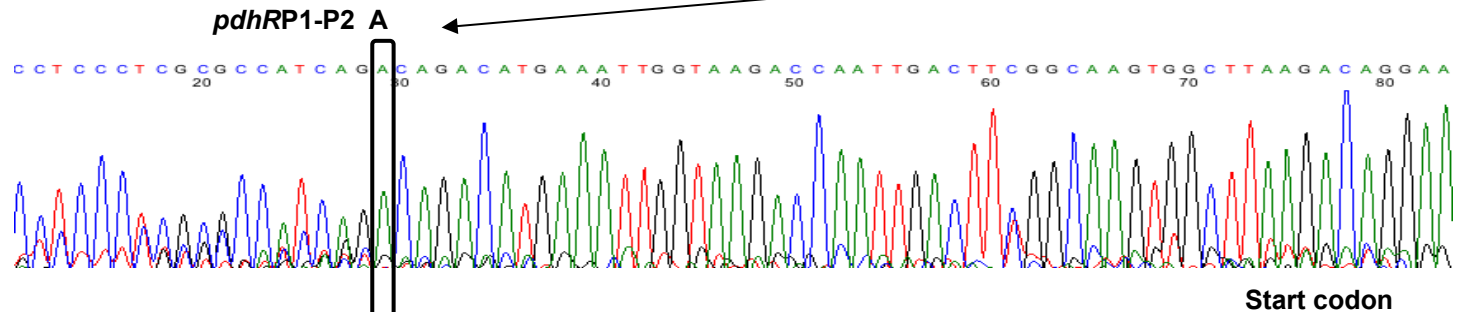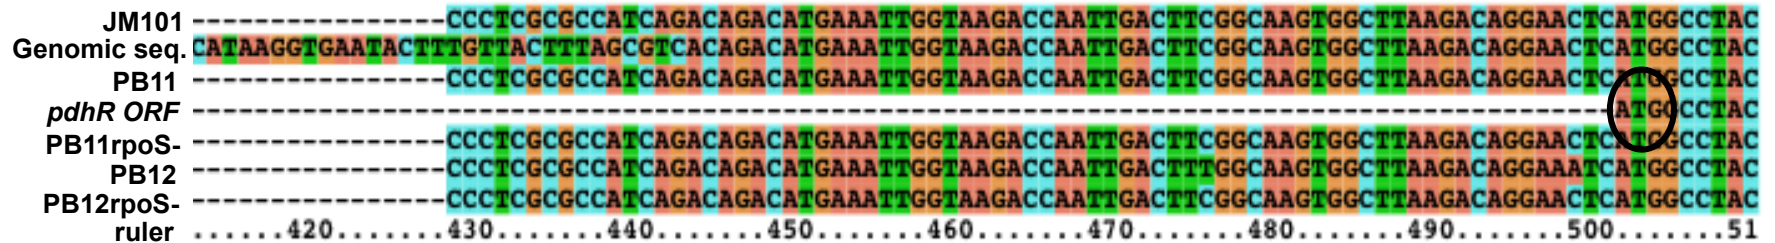

**j-1 *pdhR* Transcriptional regulator of the Pyruvate dehydrogenase**

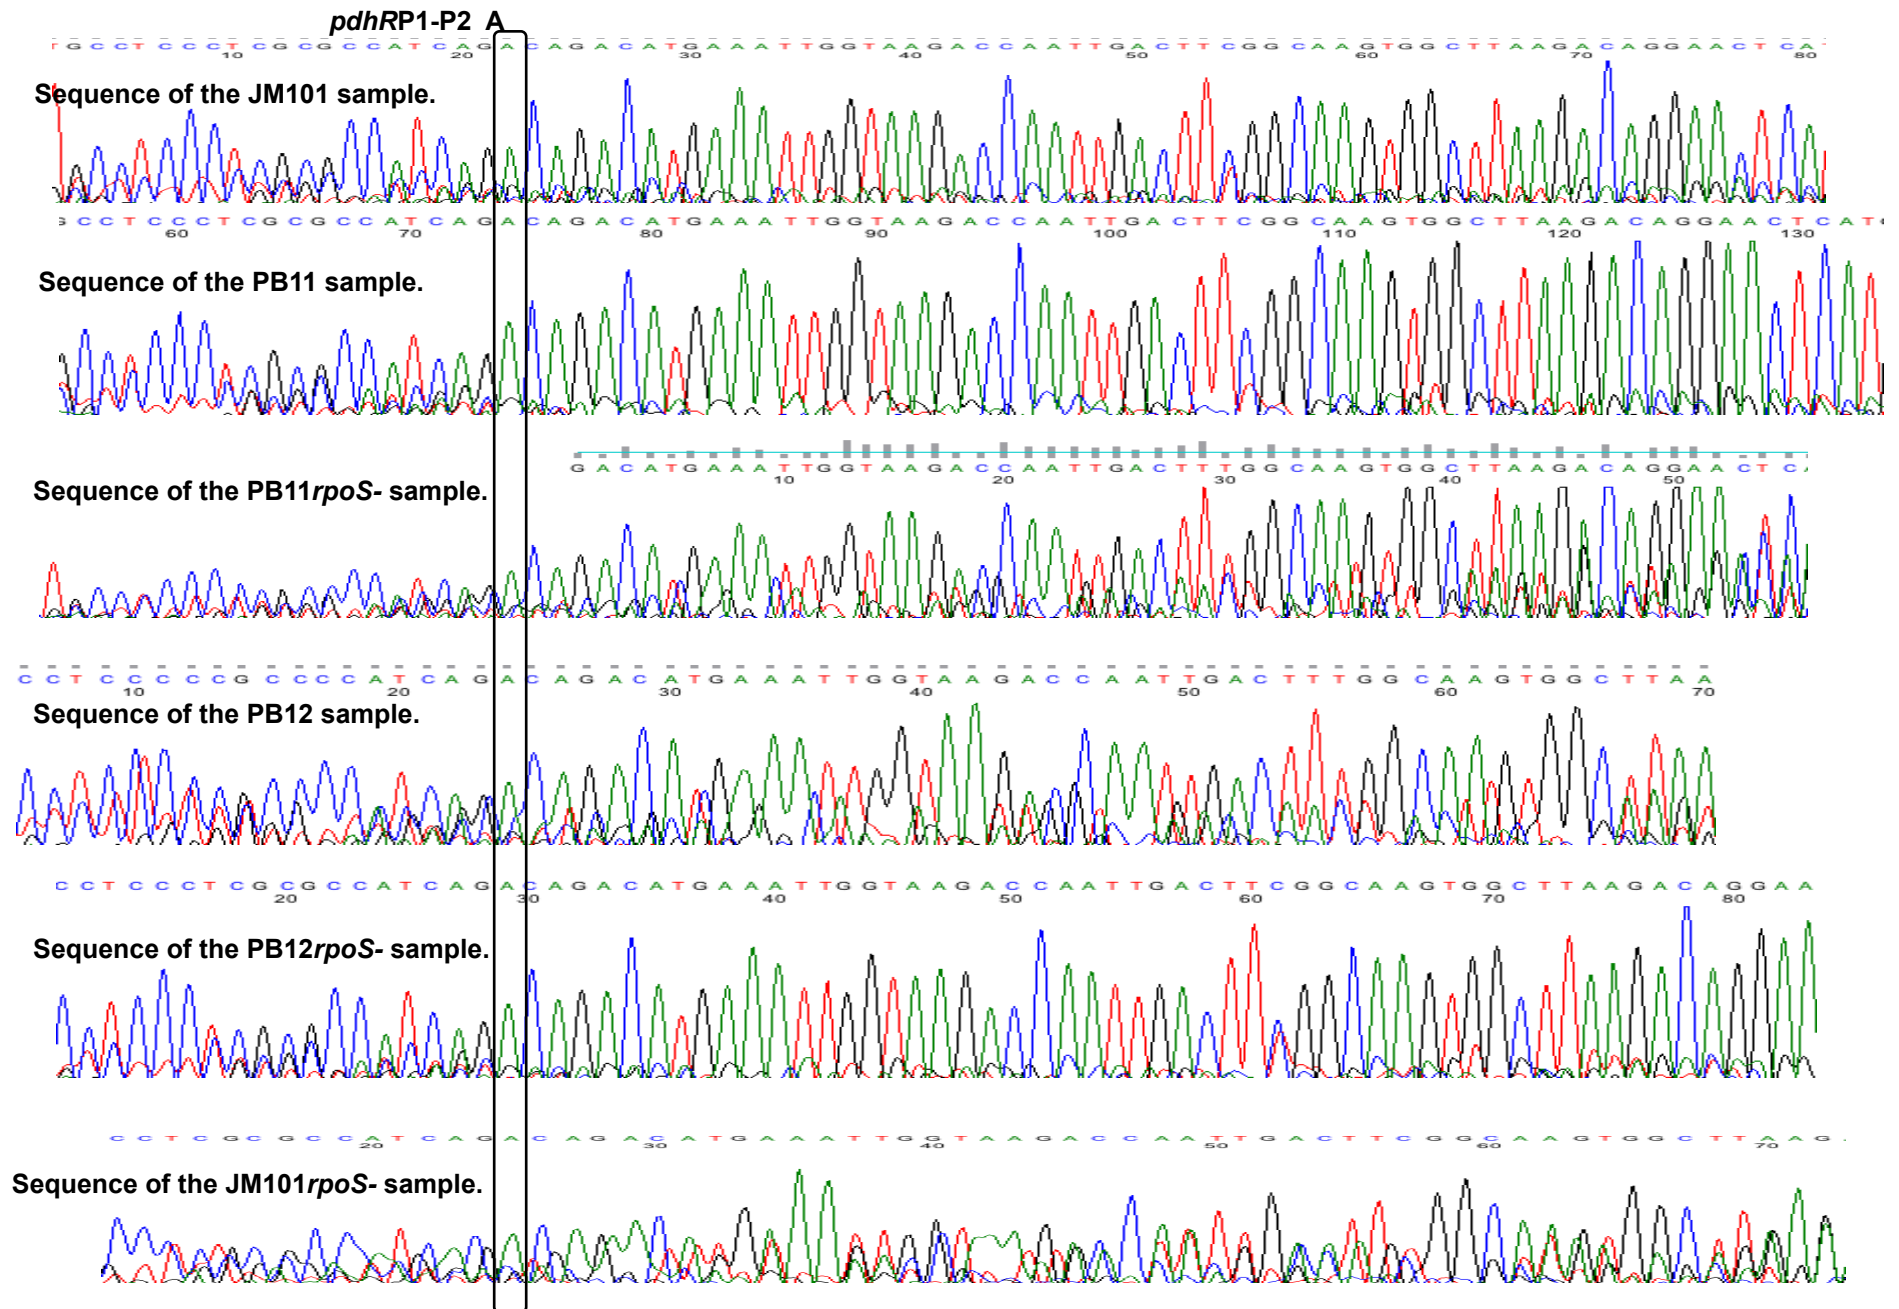



j-2 *aceE* Pyruvate dehydrogenase E1p subunit

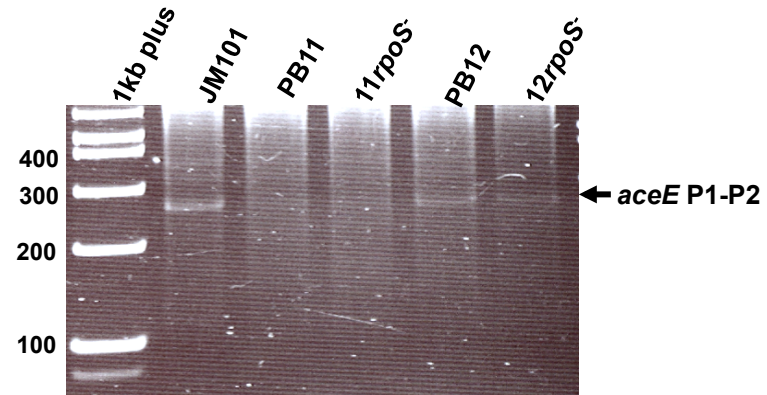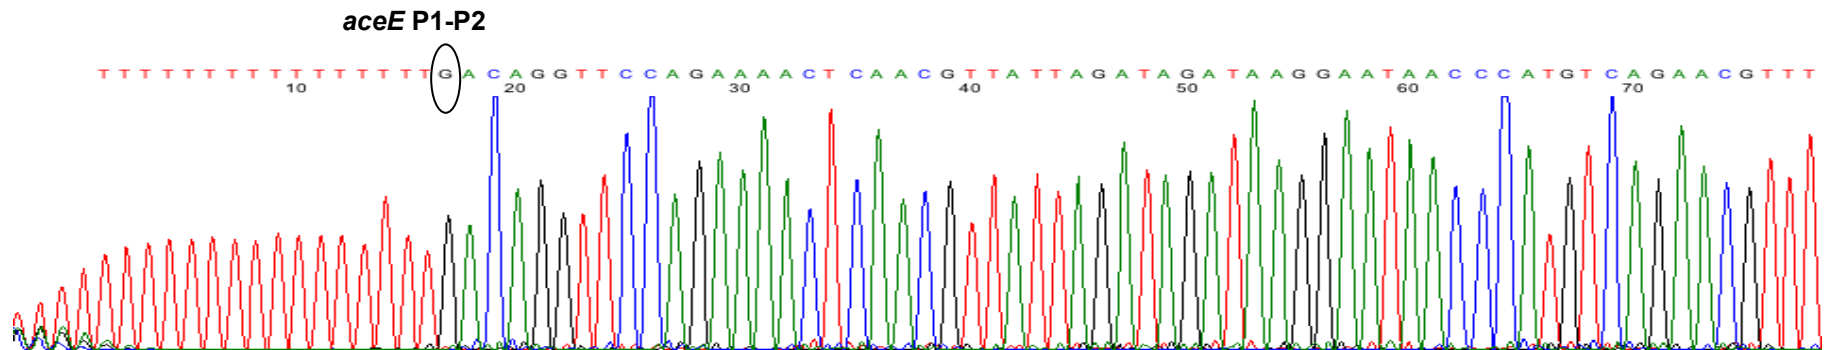

Sequence of the JM101 sample.

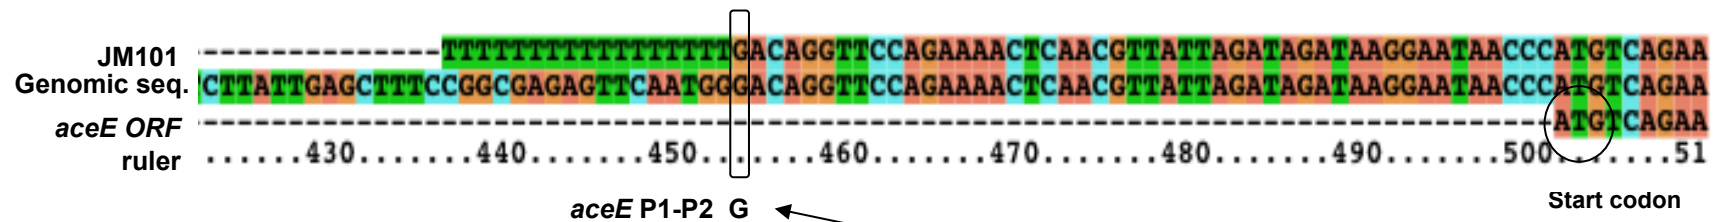

|                  |                                                                                 |
|------------------|---------------------------------------------------------------------------------|
| <b>Name:</b>     | <i>aceE</i> p                                                                   |
| <b>+1:</b>       | 122970                                                                          |
| <b>Sequence:</b> | aagcgcggcaactaaacgtagaacctgtcttattgagcttccggcgagagttcaatgggAcaggttcagaaaactcaac |

The detected TSS of the *aceE* gene is different from a previously reported by one nucleotide (50,51).

k. *poxB* Pyruvate oxidase

The detected TSS of the *poxB* gene is the same as the one previously reported (57,58).

Name: *poxBp*  
 +1: 910299  
 Sequence: ttagtgccctcctttctctcccatcccttccccctccgtcagatgaactaaacttgttaccGttatcac

two methodologies

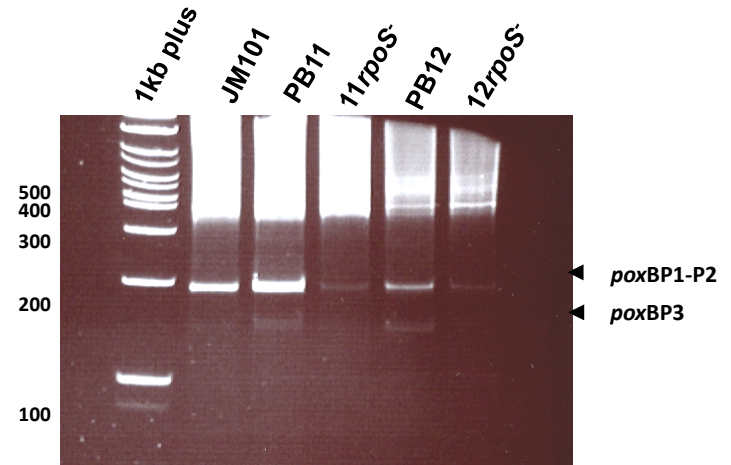

Sequence of the PB11 and PB12 mixt sample.

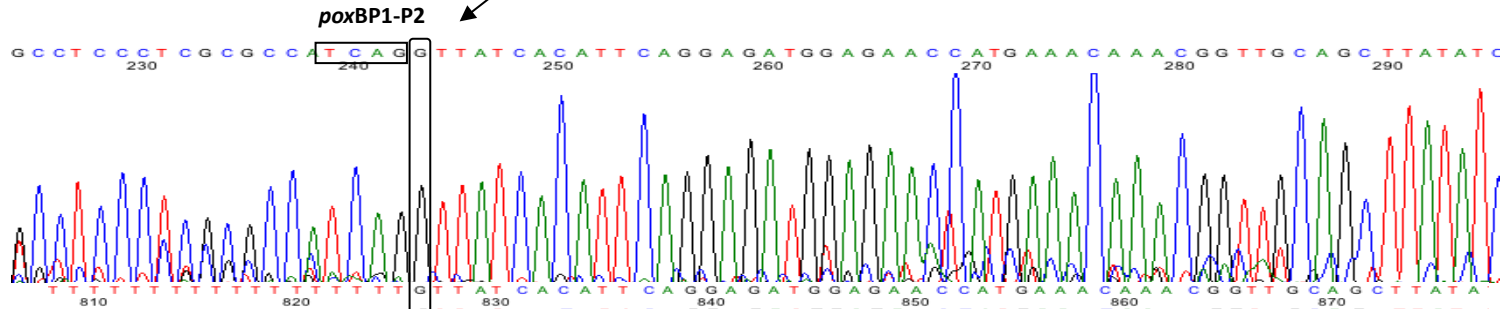

Sequence of the JM101 sample.

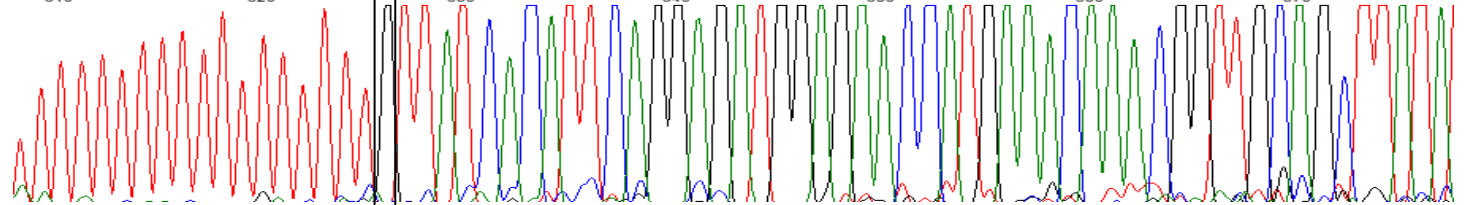

JM101 ---TTTTTTTTTTTTTTTTTTTGTATCACATTCAGGAGATGGAGAACCATGAAACAAACGGTTGCAGCTTATATCGCCAAAAACACTC  
 PB11,PB12 ---GCCTCCCTCGCGCCATCAGGTATCACATTCAGGAGATGGAGAACCATGAAACAAACGGTTGCAGCTTATATCGCCAAAAACACTC  
 Genomic seq. CAGATGAACATAAATTGTTACCGTATCACATTCAGGAGATGGAGAACCATGAAACAAACGGTTGCAGCTTATATCGCCAAAAACACTC  
*poxB* ORF -----ATGAAACAAACGGTTGCAGCTTATATCGCCAAAAACACTC  
 PB11,PB12 CACCCGCGCTCAGCCCAATCAGTTATATCGCCAAAAACACTC  
 ruler .....460.....470.....480.....490.....500.....510.....520.....530.....54

Sequence of the PB11 and PB12mixt sample.

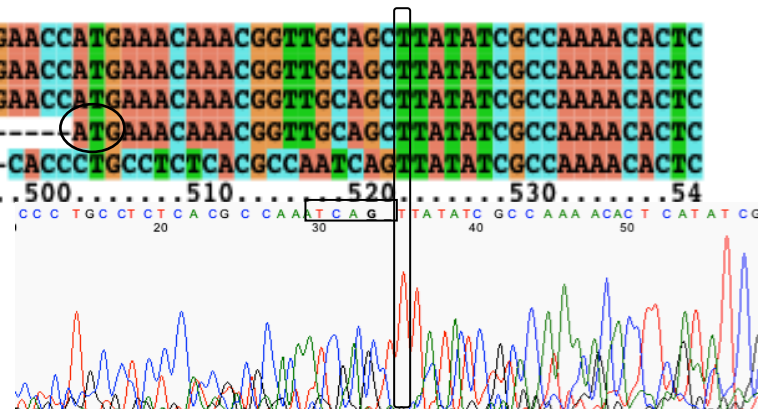

# I. *acs* Acetyl-CoA synthase

The detected TSS of the *acs* gene is the same as the one previously reported (60,61).

Name: *acsp2*  
 +1: 4285414  
 Sequence: atactaaacaaaactgccaataccctacattttaacgcttatgccacatattattaacatCctaca

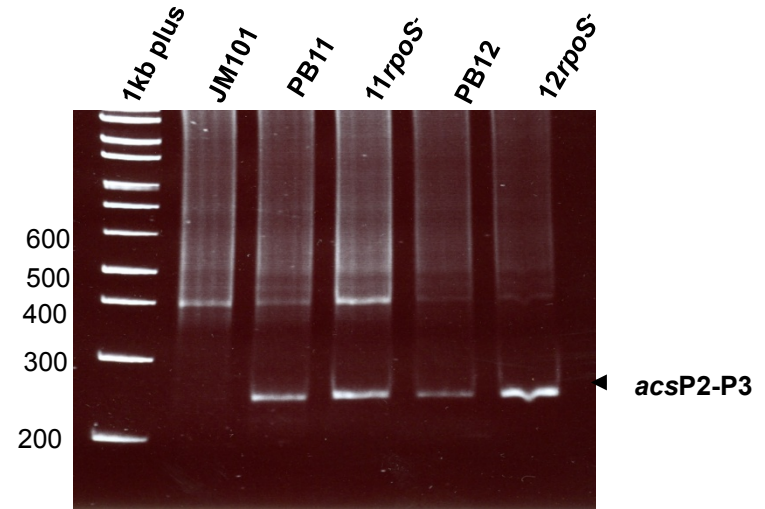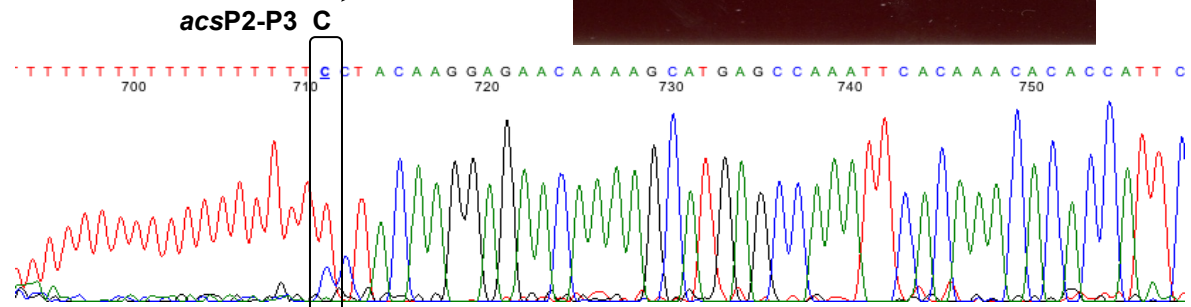

Two different methodologies were utilized for the detection of the TSS.

Sequence of the PB11 sample.

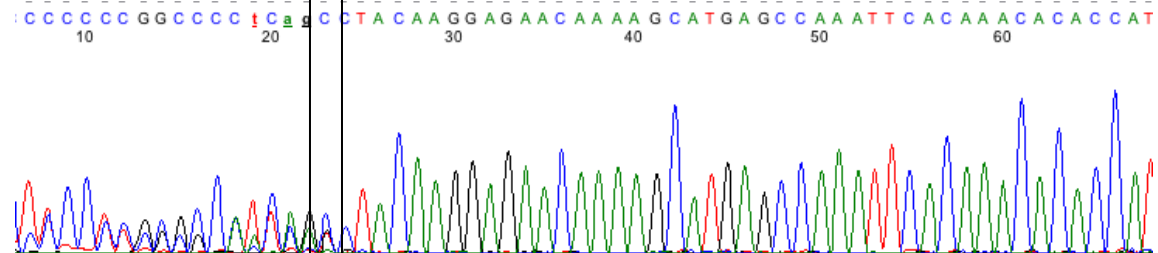

Sequence of the PB12 sample.

|                |                                                                                                                                   |                                                                             |
|----------------|-----------------------------------------------------------------------------------------------------------------------------------|-----------------------------------------------------------------------------|
| <i>acs</i> ORF | -----                                                                                                                             | ATGAGCCAAATTCACAAACACACCATTCTTGCCA                                          |
| Genomic seq.   | CCTACATTTAACGCTTATGCCACATATTATTAACA                                                                                               | TCTACAAGGAGAAACAAAAGCATGAGCCAAATTCACAAACACACCATTCTTGCCA                     |
| PB12           | -----                                                                                                                             | TCCCTCGCCGCAFCAGCCTACAAGGAGAAACAAAAGCATGAGCCAAATTCACAAACACACCATTCTTGCCA     |
| PB11           | -----                                                                                                                             | TTTTTTTTTTTTTTTTTTTTTCTACAAGGAGAAACAAAAGCATGAGCCAAATTCACAAACACACCATTCTTGCCA |
| ruler          | ... 450 . . . . . 460 . . . . . 470 . . . . . 480 . . . . . 490 . . . . . 500 . . . . . 510 . . . . . 520 . . . . . 530 . . . . . |                                                                             |

Start codon
